# Supplementary material for: Phylogenomic evidence for ancient hybridization in the genomes of living cats (Felidae)
Source: PubMed Central journal article supplement — Genome Res. 2016 Jan;26(1):1–11. doi: 10.1101/gr.186668.114 (PMC4691742; doi:10.1101/gr.186668.114), 2016-01
Supplement: supp_gr.186668.114_Supplemental_Materials.pdf [file supp_gr.186668.114_Supplemental_Materials.pdf]

**Supplementary Materials for *Phylogenomic evidence for ancient hybridization in the genomes of living cats (Felidae)*.**

Gang Li, Brian W. Davis, Eduardo Eizirik, and William J. Murphy

**Figure S1.** SNP-based maximum likelihood tree (GTR+ $\Gamma$ ) based on a matrix of 59,628 SNPs and 101 felid individuals. Refer to Table S1 for the full taxonomic name referenced by each three-letter species code. The asterisk next to pampas cat individual LCO-01 refers to a pampas cat previously documented as a hybrid based on its possession of tigrina mtDNA (the same individual referred to as Lco02 in Johnson et al. [1999]). Because this hybrid is from a captive population it is difficult to ascertain if the hybridization occurred in the wild (Johnson et al. 1999). The genotype of LCO-01 is phylogenetically intermediate to both species, and an analysis of its genome-wide SNP genotype profile indicates it is an early generation hybrid.

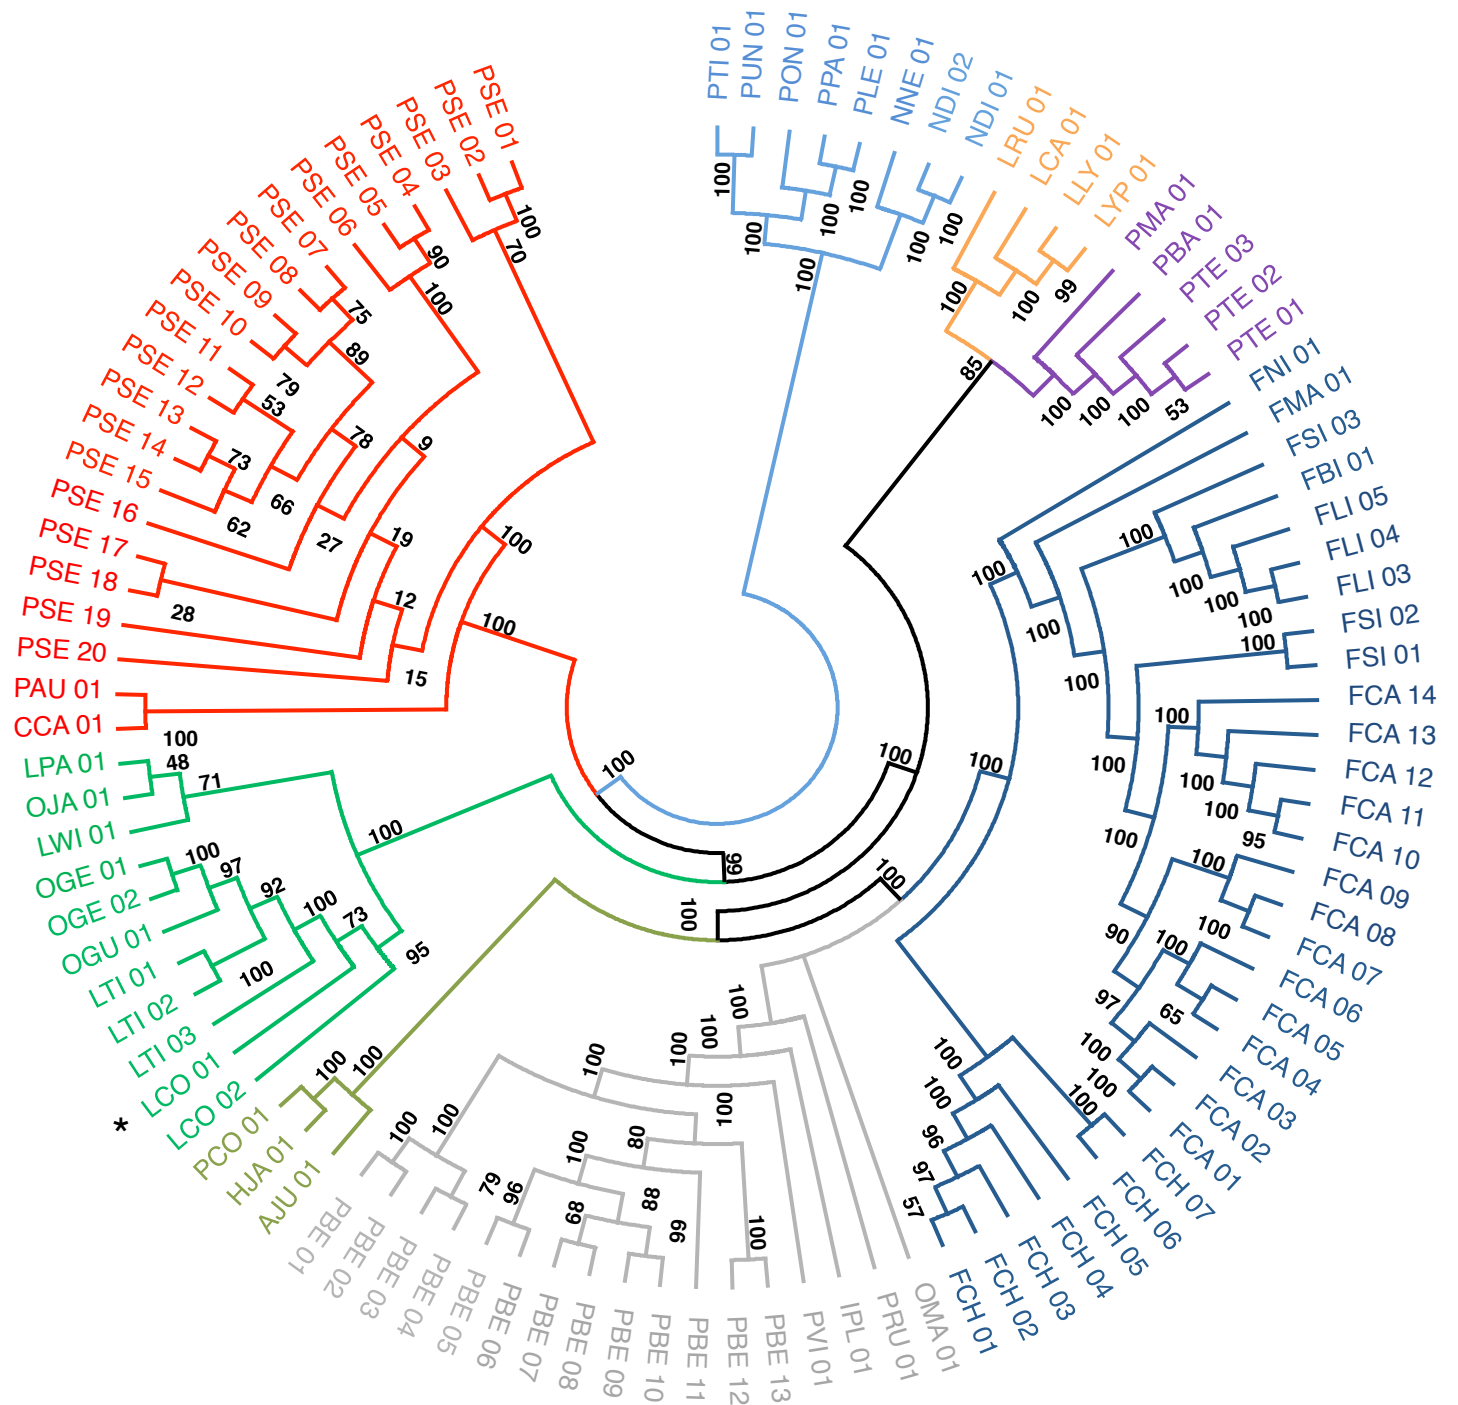

**Figure S2.** SNP-based maximum likelihood trees for each chromosome (w/bootstrap support). All support values for monophyly of each lineage were greater than 90% (not shown).

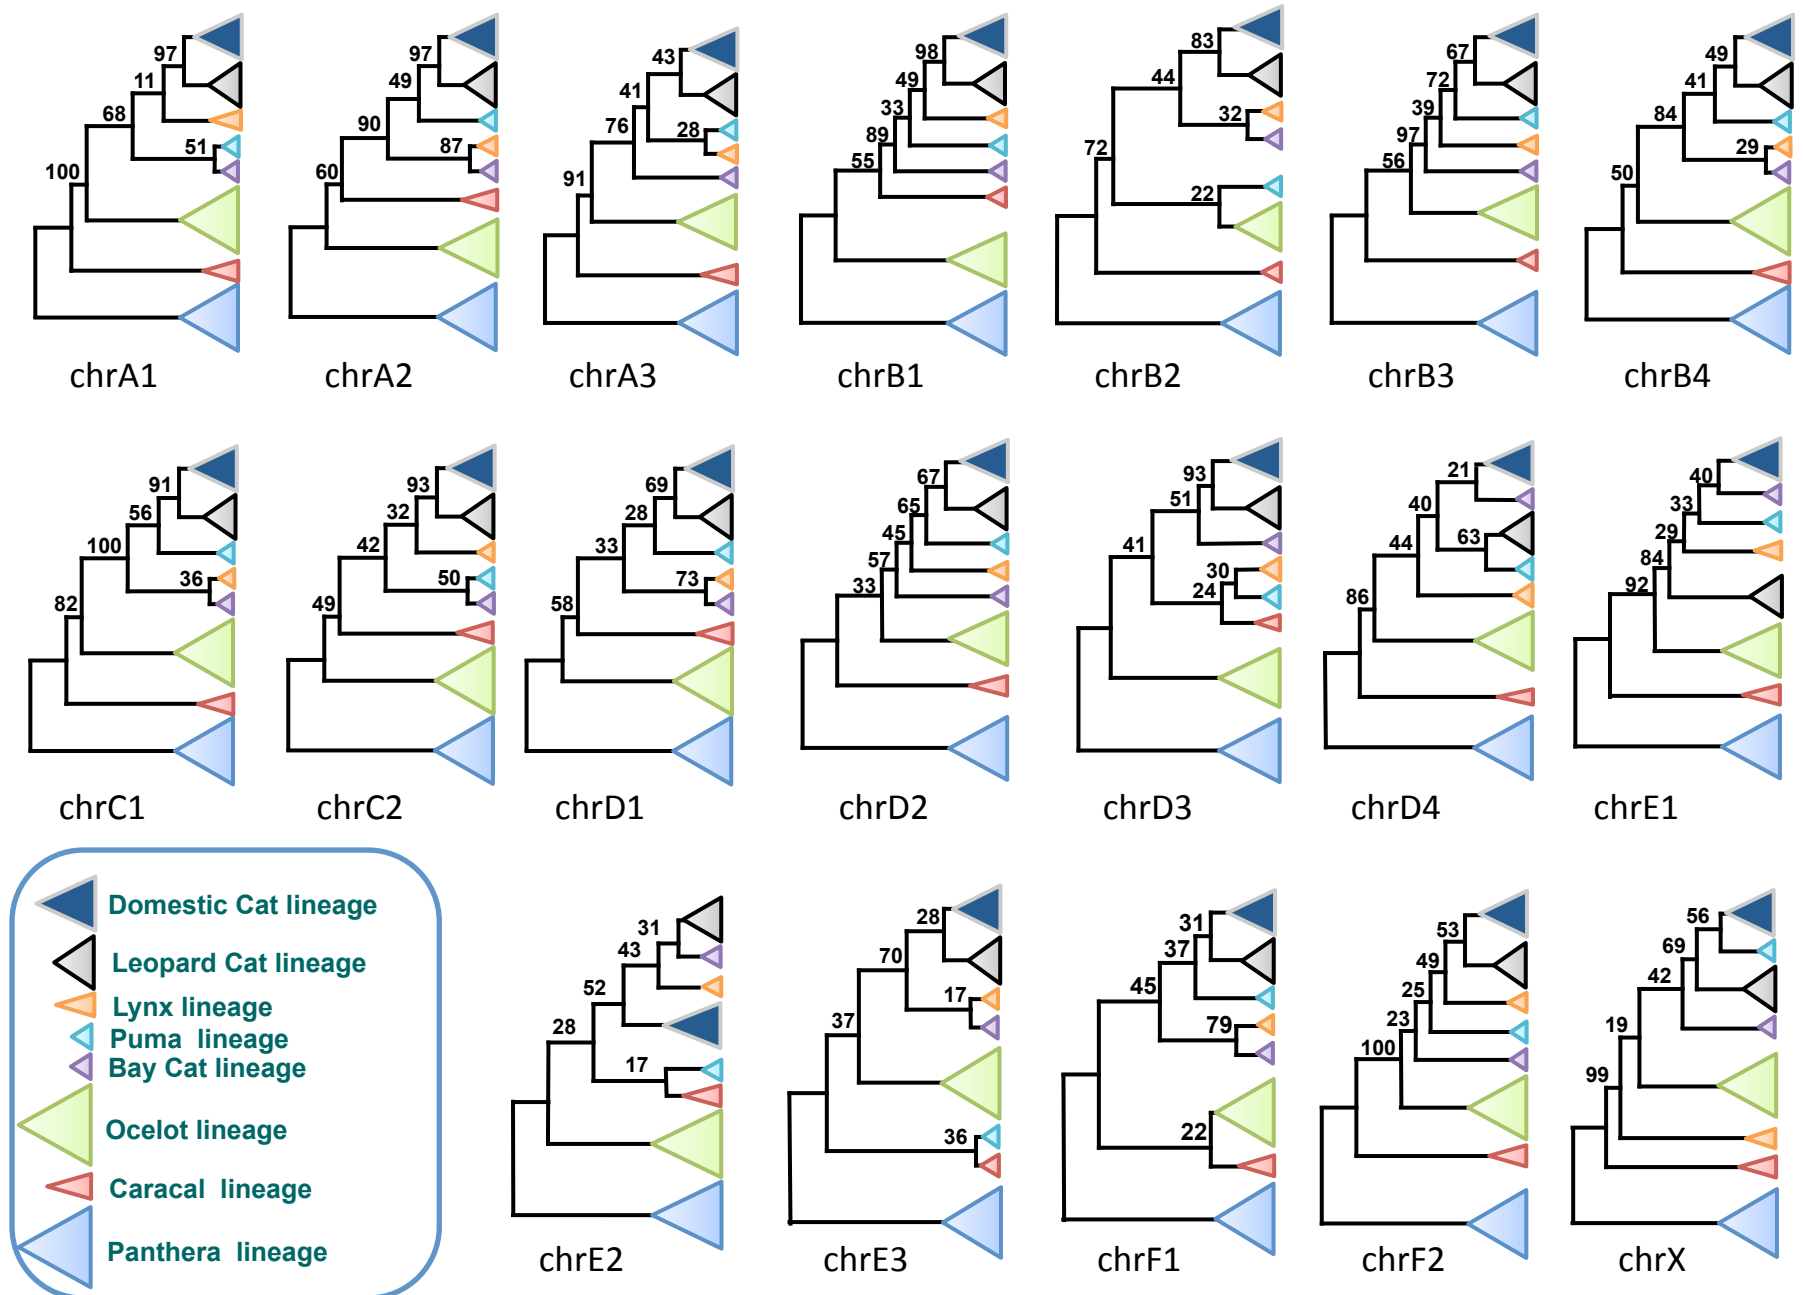

**Figure S3.** *VIR* gene maximum likelihood tree (GTR+ $\Gamma$ ) based on a 49,708-bp supermatrix of 26 vomeronasal receptor genes and pseudogenes, sequenced from 27 felids across all felid lineages (Montague et al. 2014).

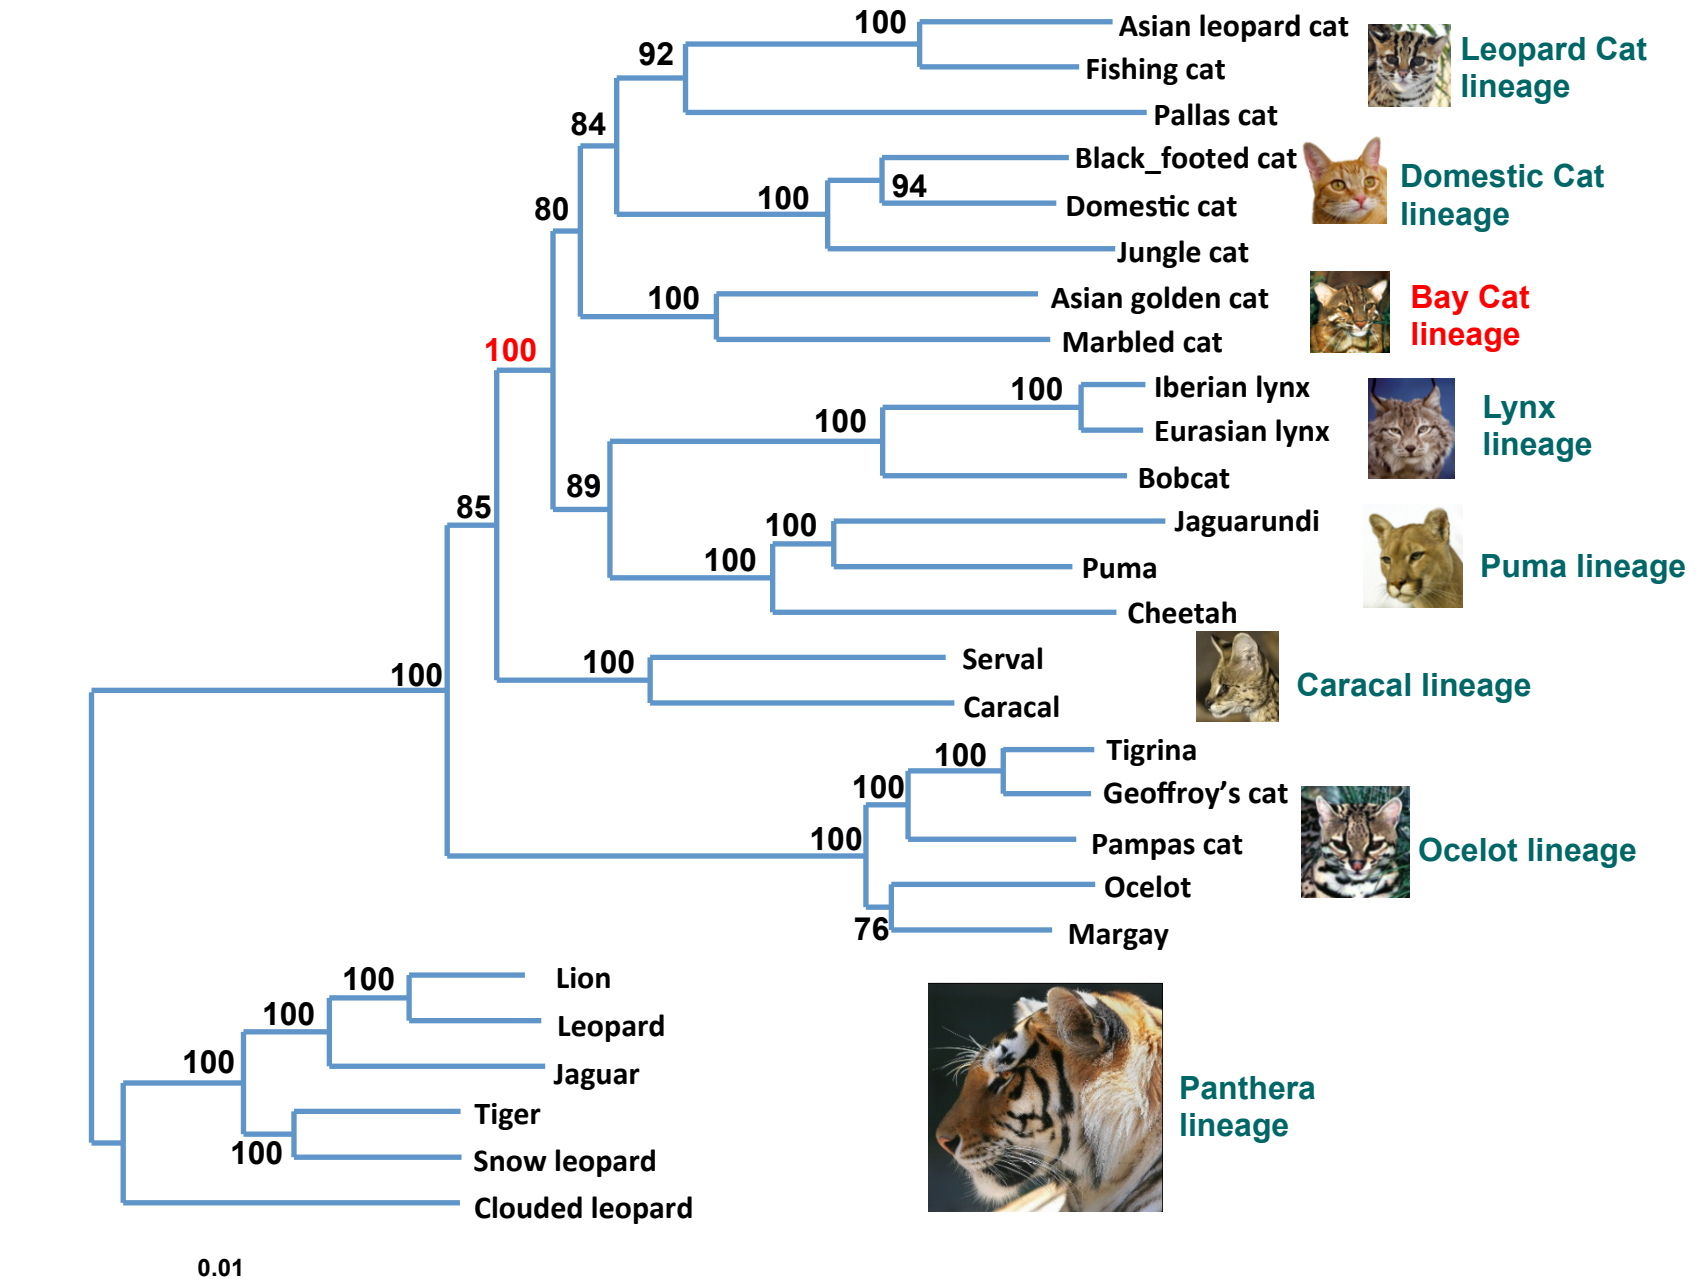

**Figure S4A.** Alignment between reference mitogenomes generated in the present study and mitogenomes from GenBank. The consensus sequence between the reference mitogenome sequence (top black line denoted with REF and black arrowhead) and the GenBank reference sequence(s) (bottom gray bars) is shown on the top of each subfigure. Felid mitochondrial genomes shown below possess no numt contamination.

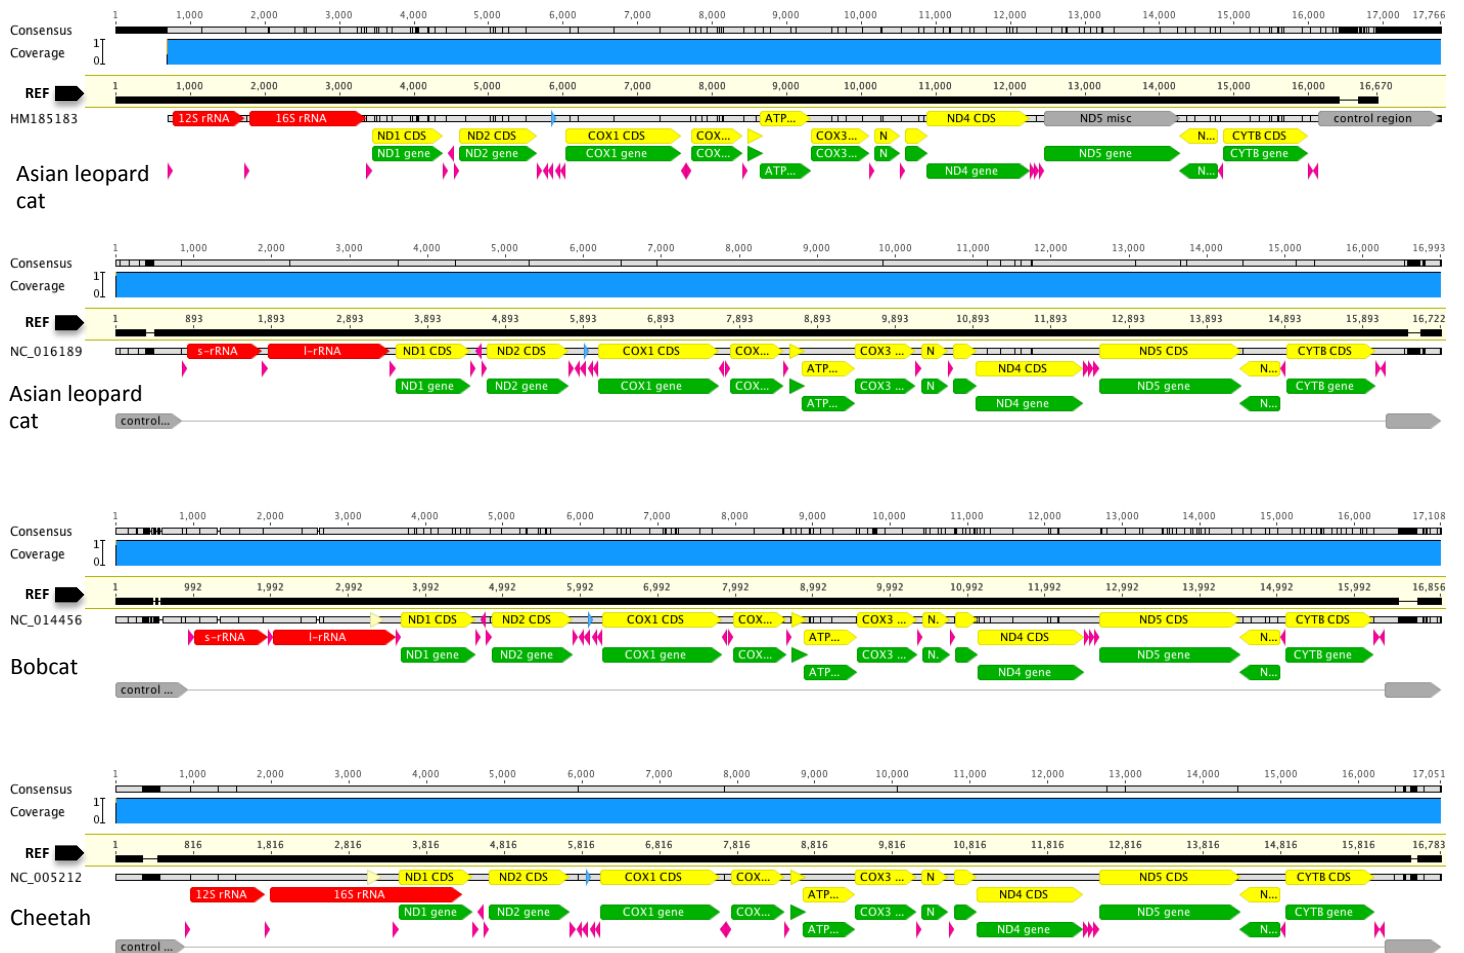

**Figure S4B.** Felid mitochondrial genomes with probable numt contamination. The consensus sequence between the reference mitogenome sequence (top black line denoted with REF and black arrowhead) and the GenBank reference sequence(s) (bottom gray bars) is shown on the top of each subfigure. Vertical black lines within the consensus and individual GenBank reference sequences indicate nucleotide substitutions relative to the reference. Red boxes highlight regions with significantly elevated nucleotide divergence compared to the reference, and represent probable numts. Mitochondrial gene annotation is indicated with colored arrowheads.

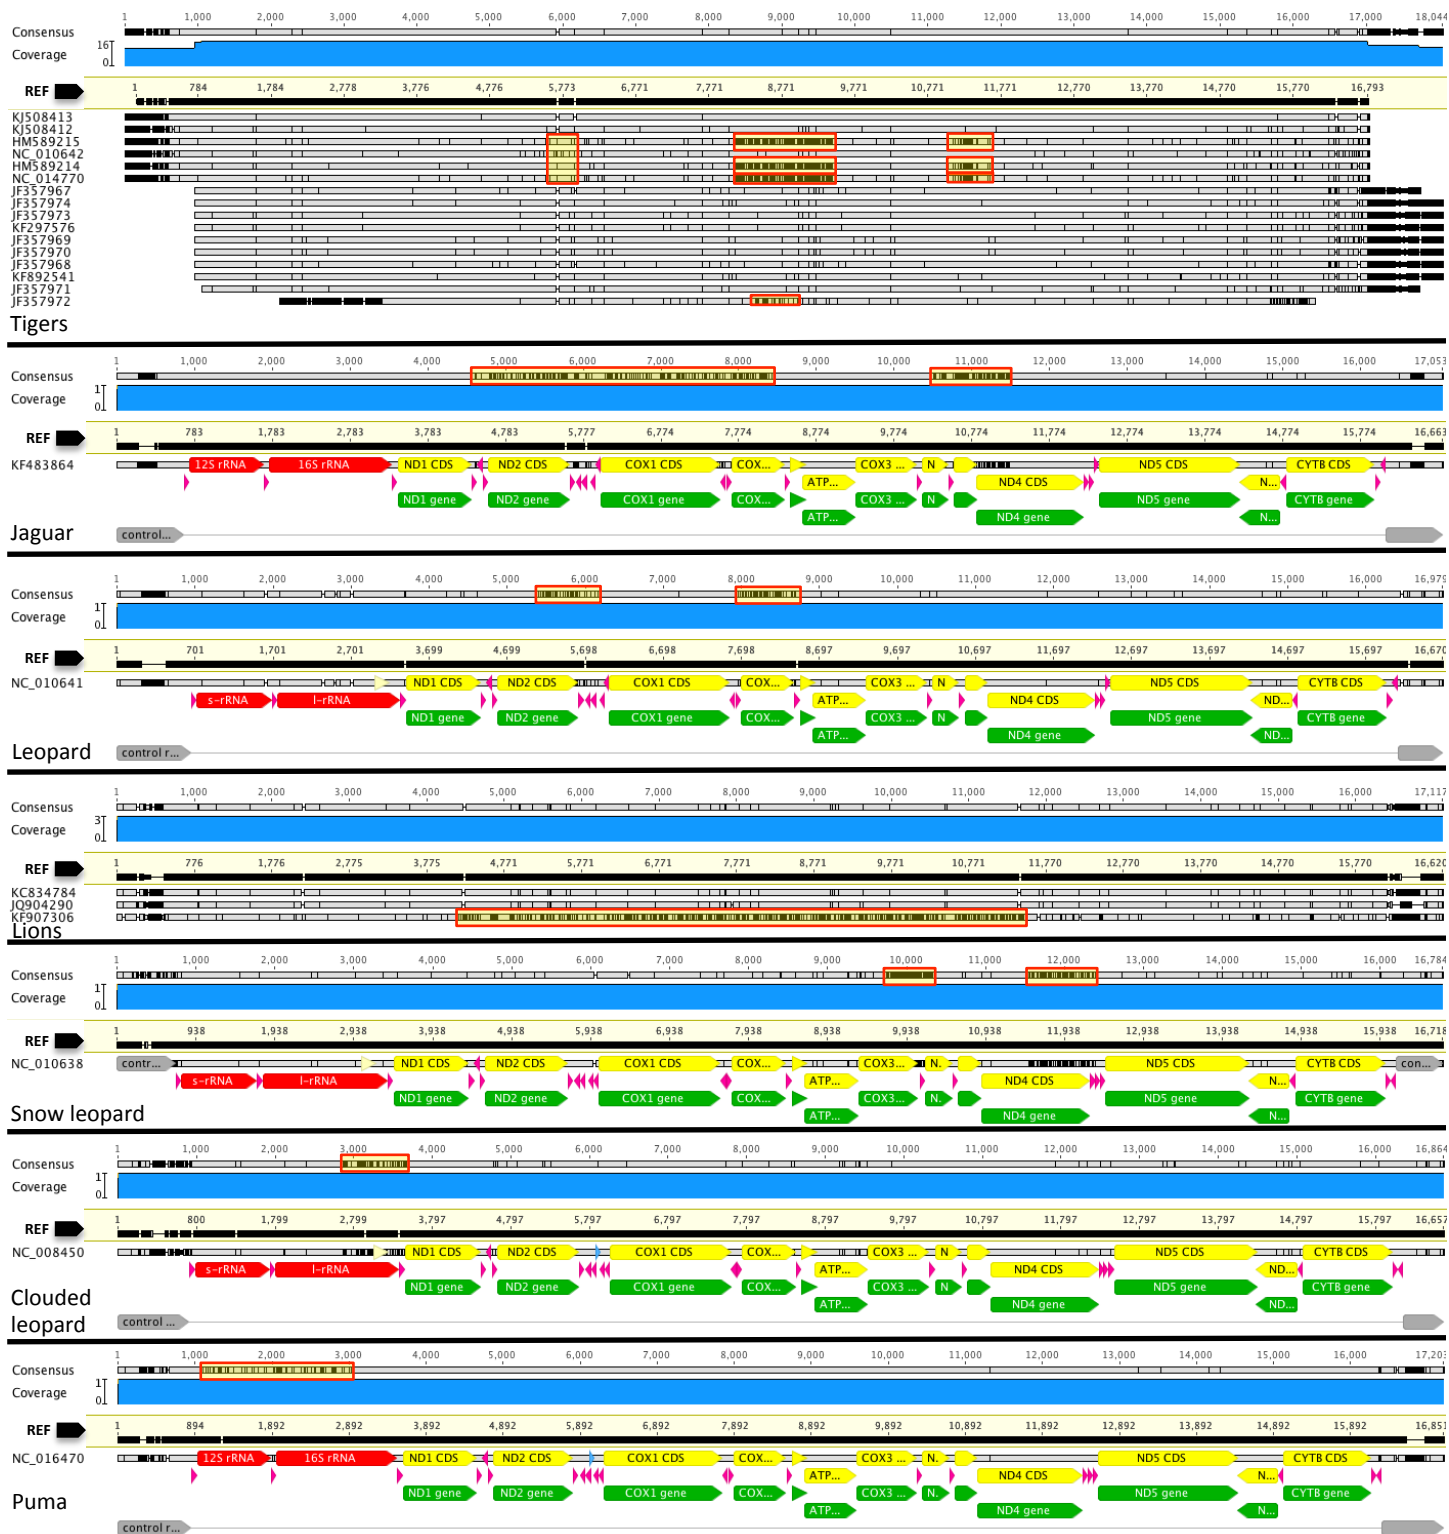

**Figure S5A.** Composite *mcmctree*-based timetree based on an average of nodal age point estimates from eight different analyses (Table S3) of the biparental nuclear genome matrix. Gray bars indicate composite credibility intervals (maximum and minimum nodal ages observed across all analyses).

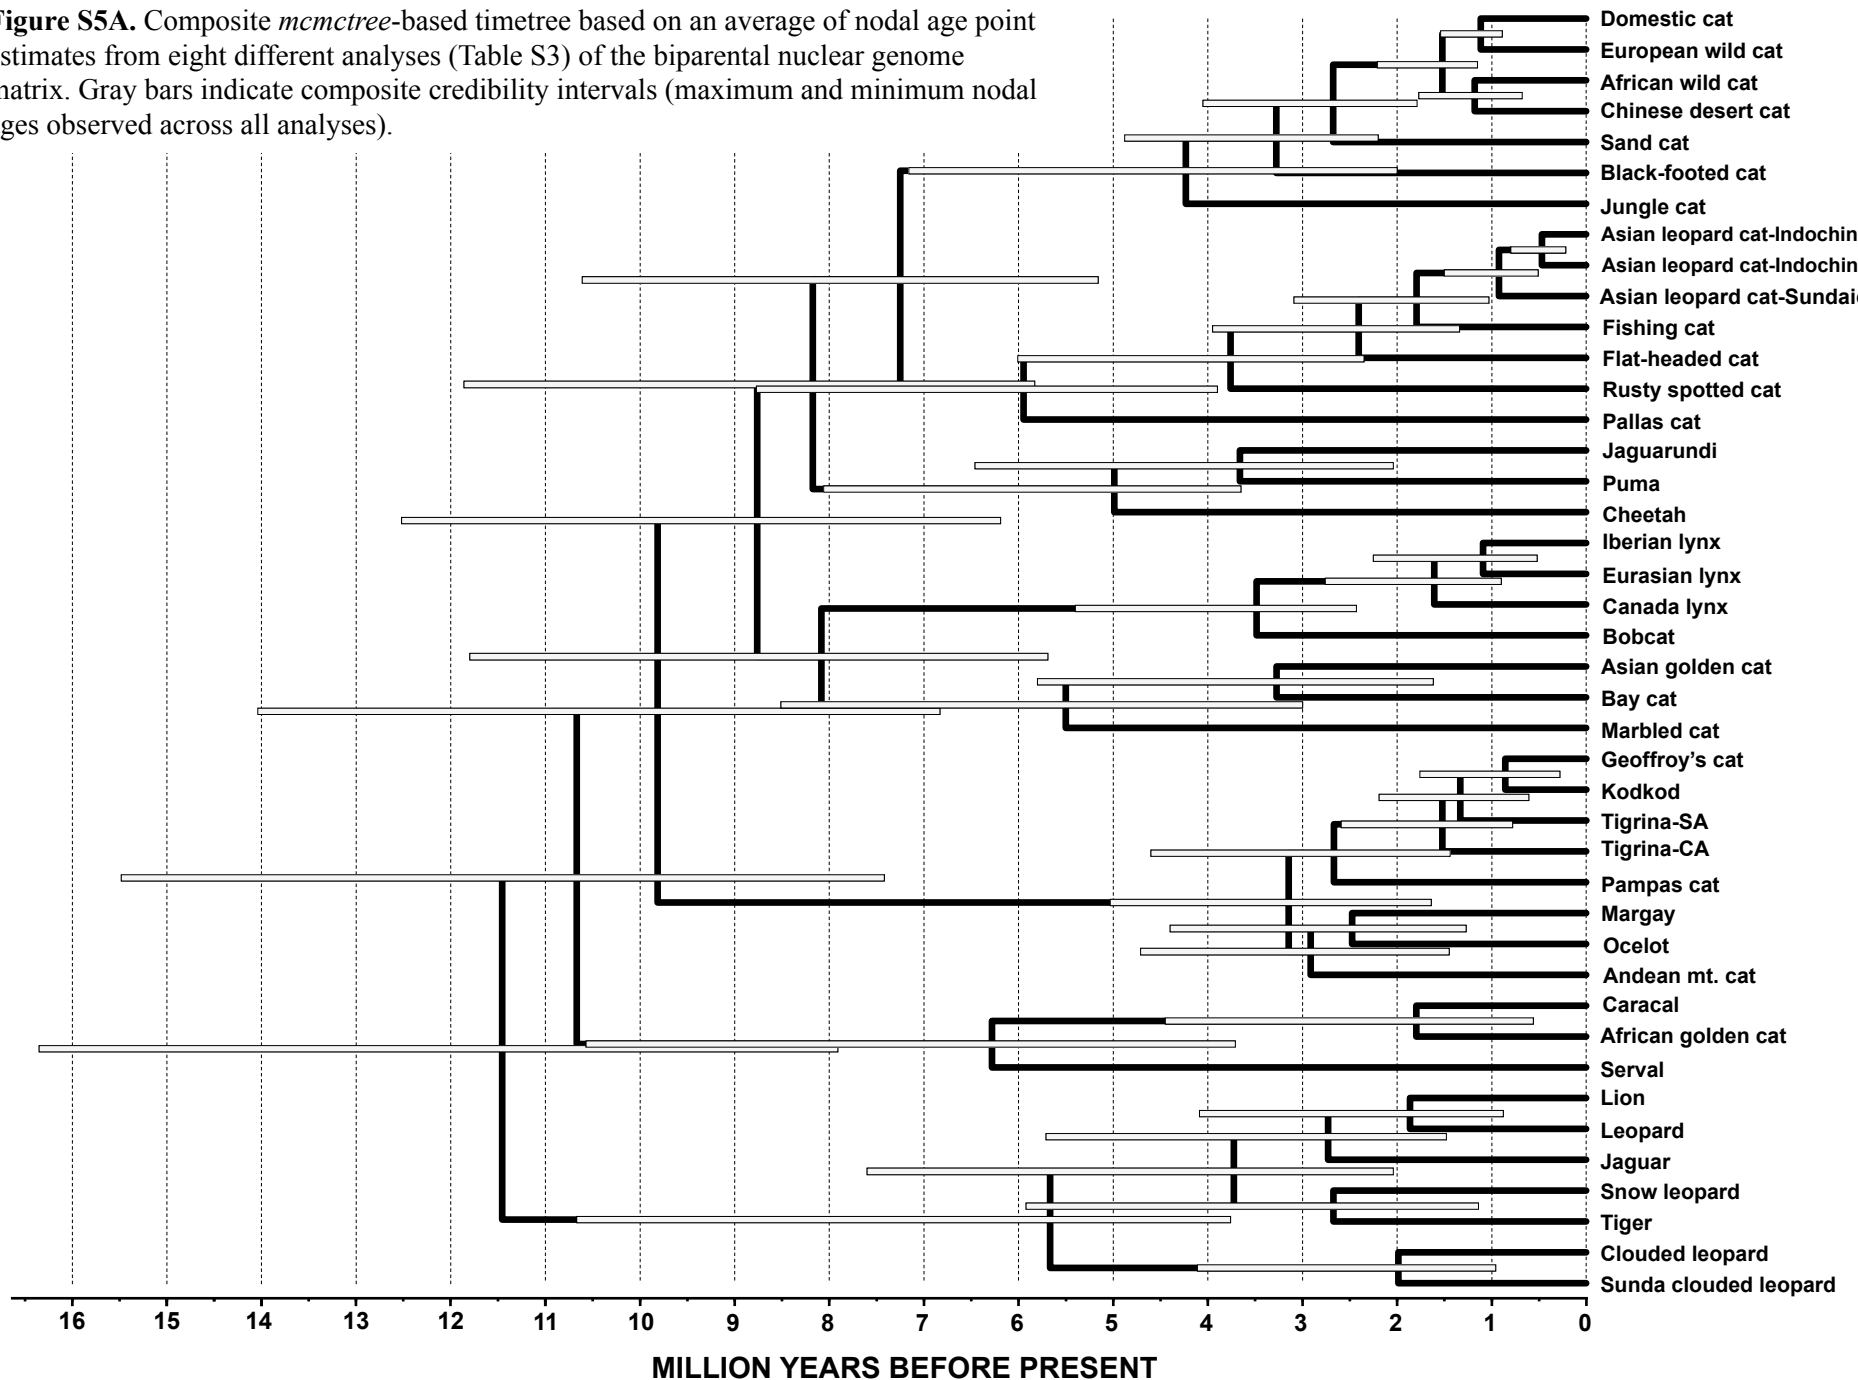

**Figure S5B.** Composite *mcmctree*-based timetree based on an average of nodal age point estimates from four different analyses (Table S4) of the mitogenome data. Blue bars indicate composite credibility intervals (maximum and minimum nodal ages observed across all analyses).

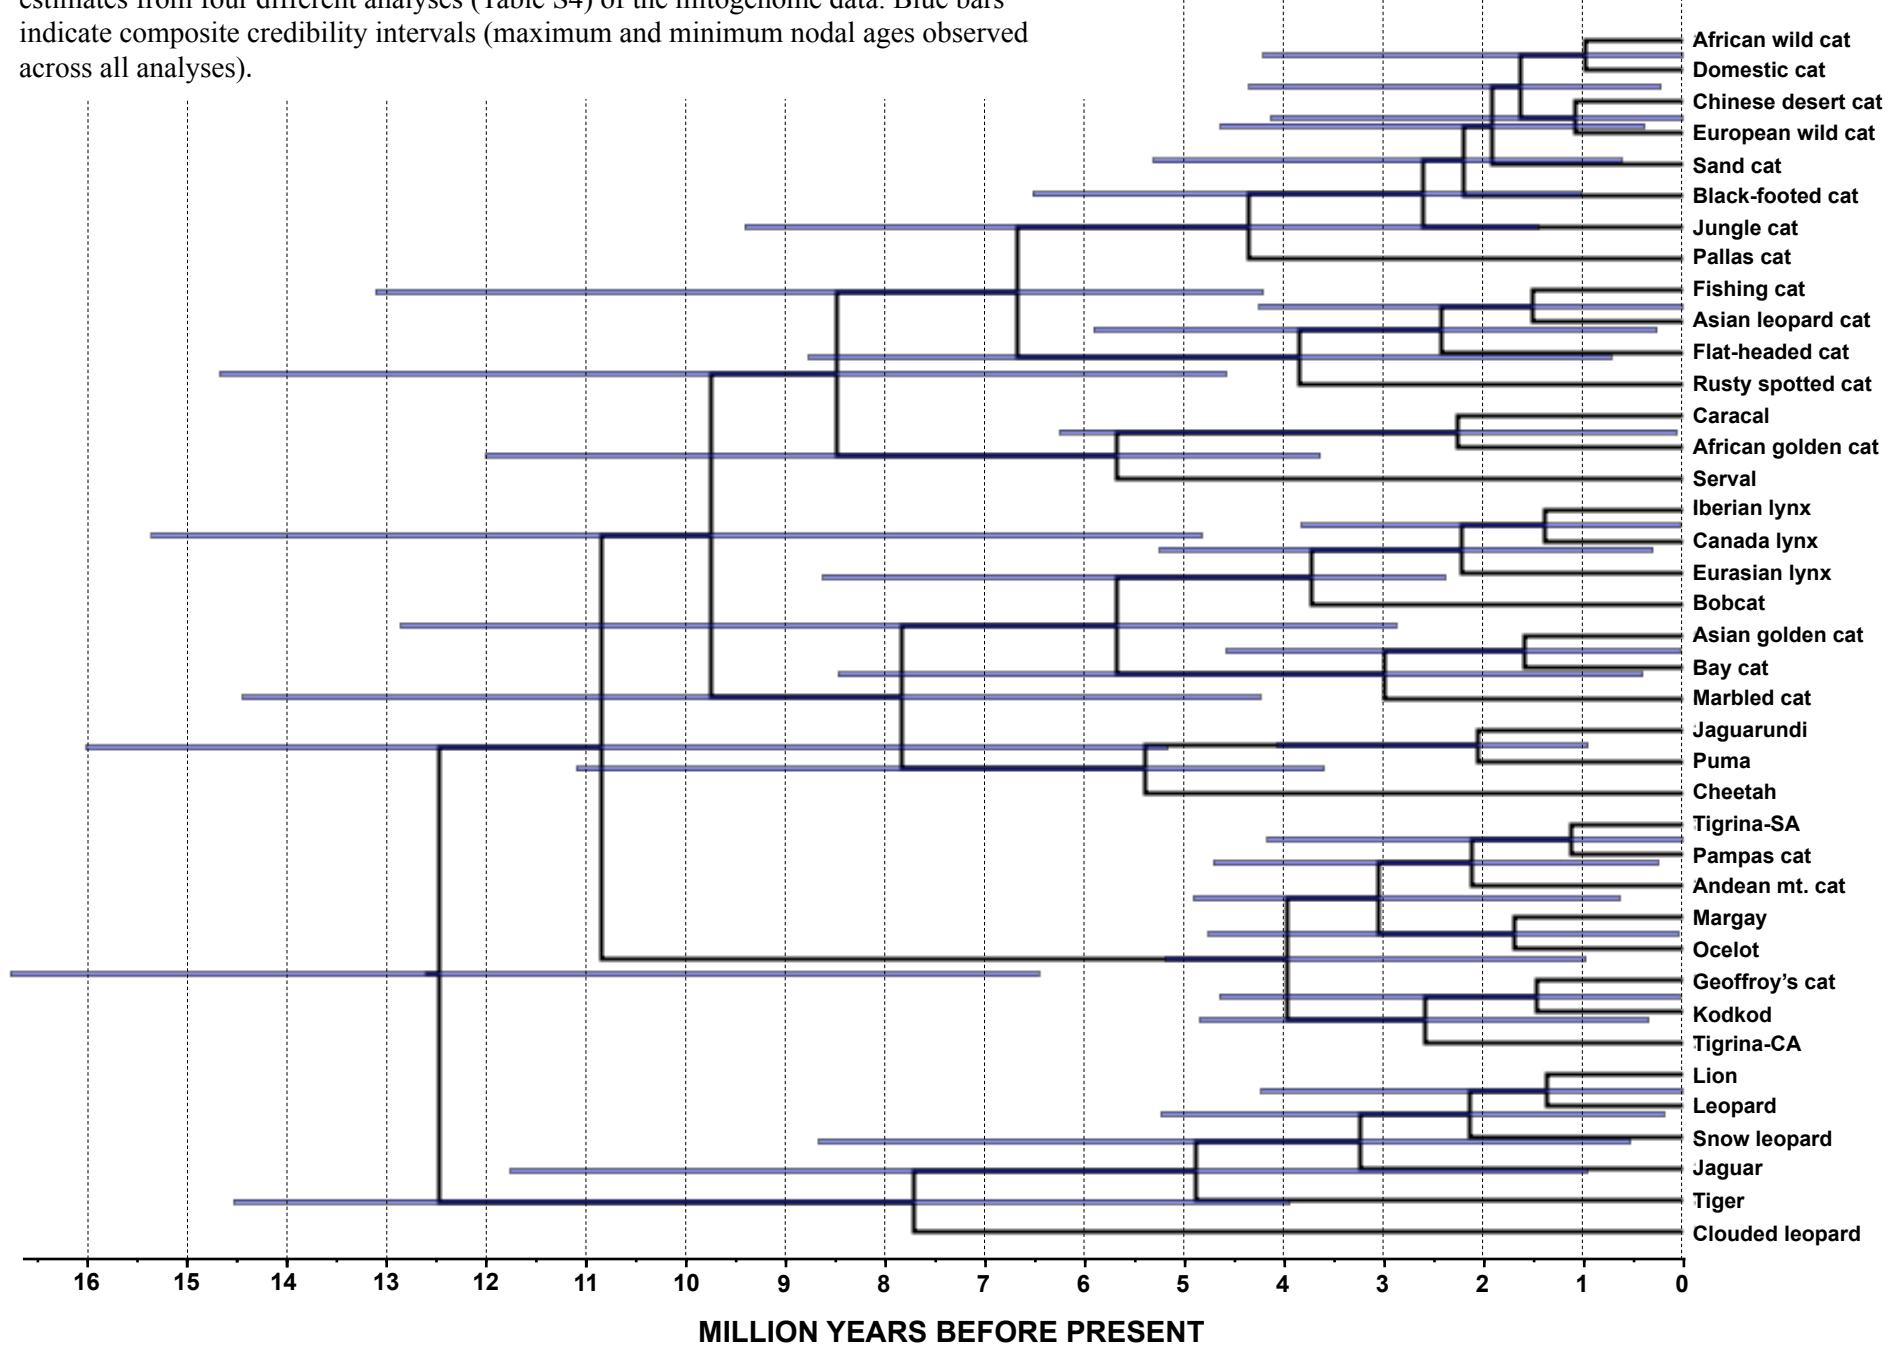



**Figure S6.** Bayesian-based ancestral area reconstruction for living Felidae. Terminal taxa are coded based on their current/historical geographic distributions. Pie charts indicate the relative posterior probability assigned to different geographic areas (see legend below).

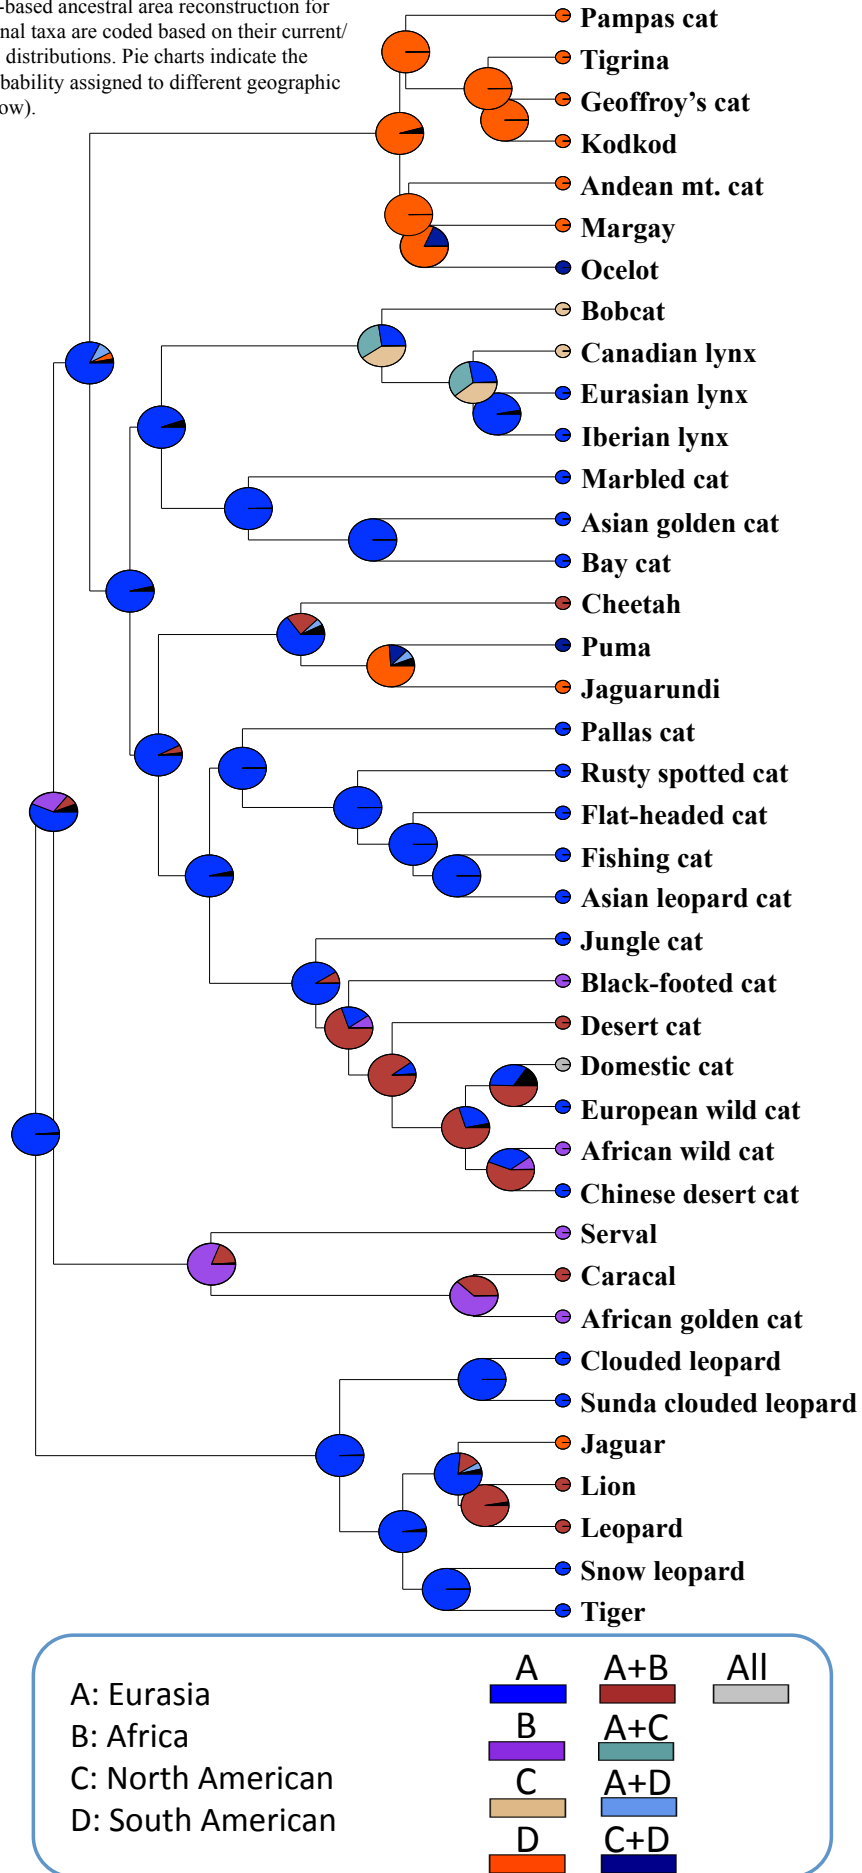

**Figure S7.** SNP density across all chromosomes within the domestic cat version 6.2 (felCat5) genome assembly. chrUN is not shown. The y-axis displays no. SNPs/Mb, calculated across the length of each felid chromosome (gray horizontal bars, with the centromere depicted as a box). Chromosomes F1 and F2 are acrocentric. Note the reduced SNP density within the central portion of the X chromosome which is within the low recombining region indicated in Fig. 4. Image is from Davis et al. 2015.

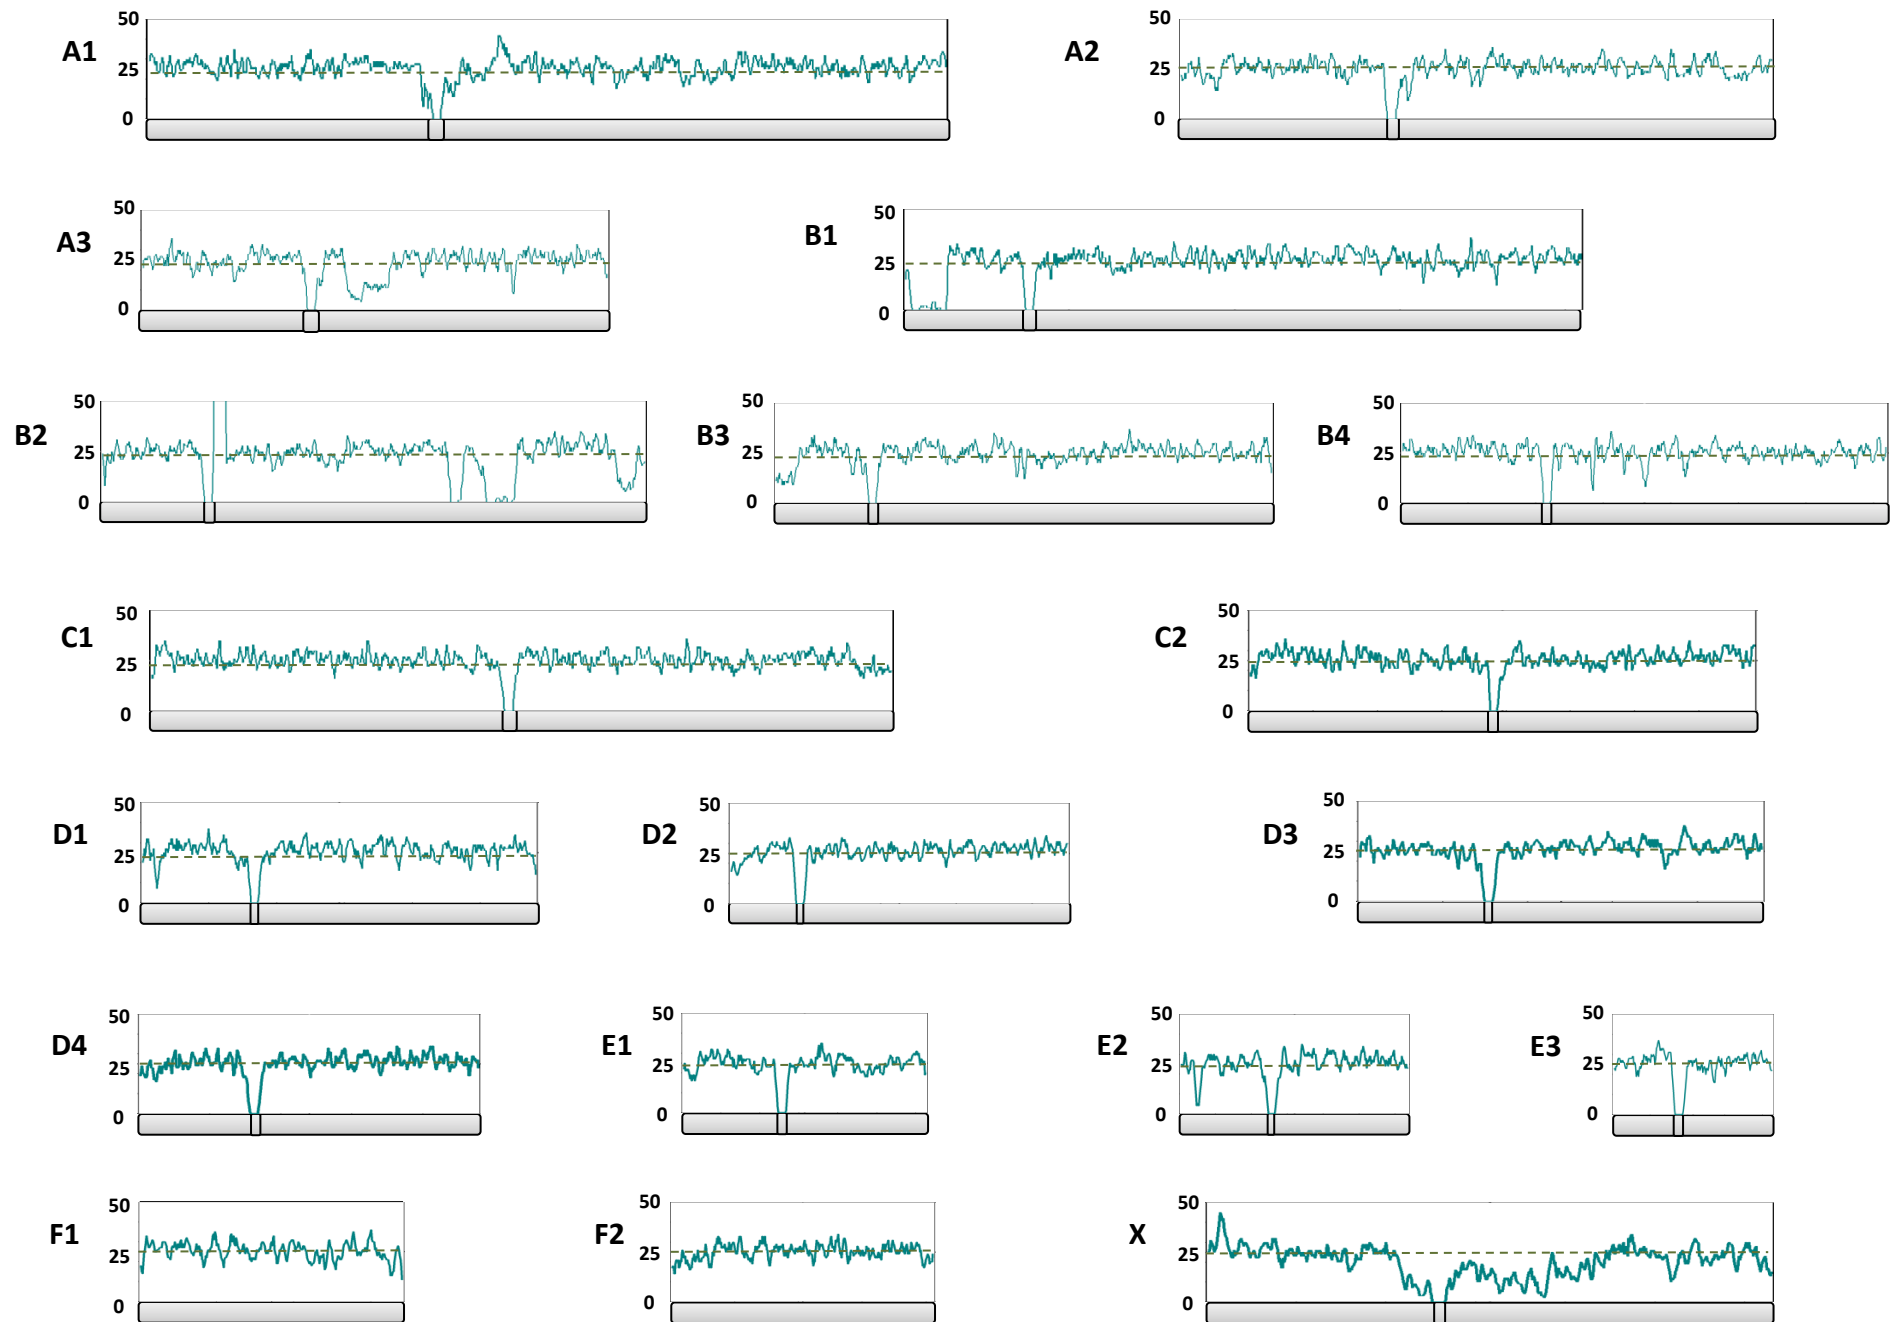

**Figure S8.** Mitogenome-based maximum likelihood tree (GTR+ $\Gamma$ ) based on synonymous substitutions. Nodes w/bootstrap support <70% are collapsed.

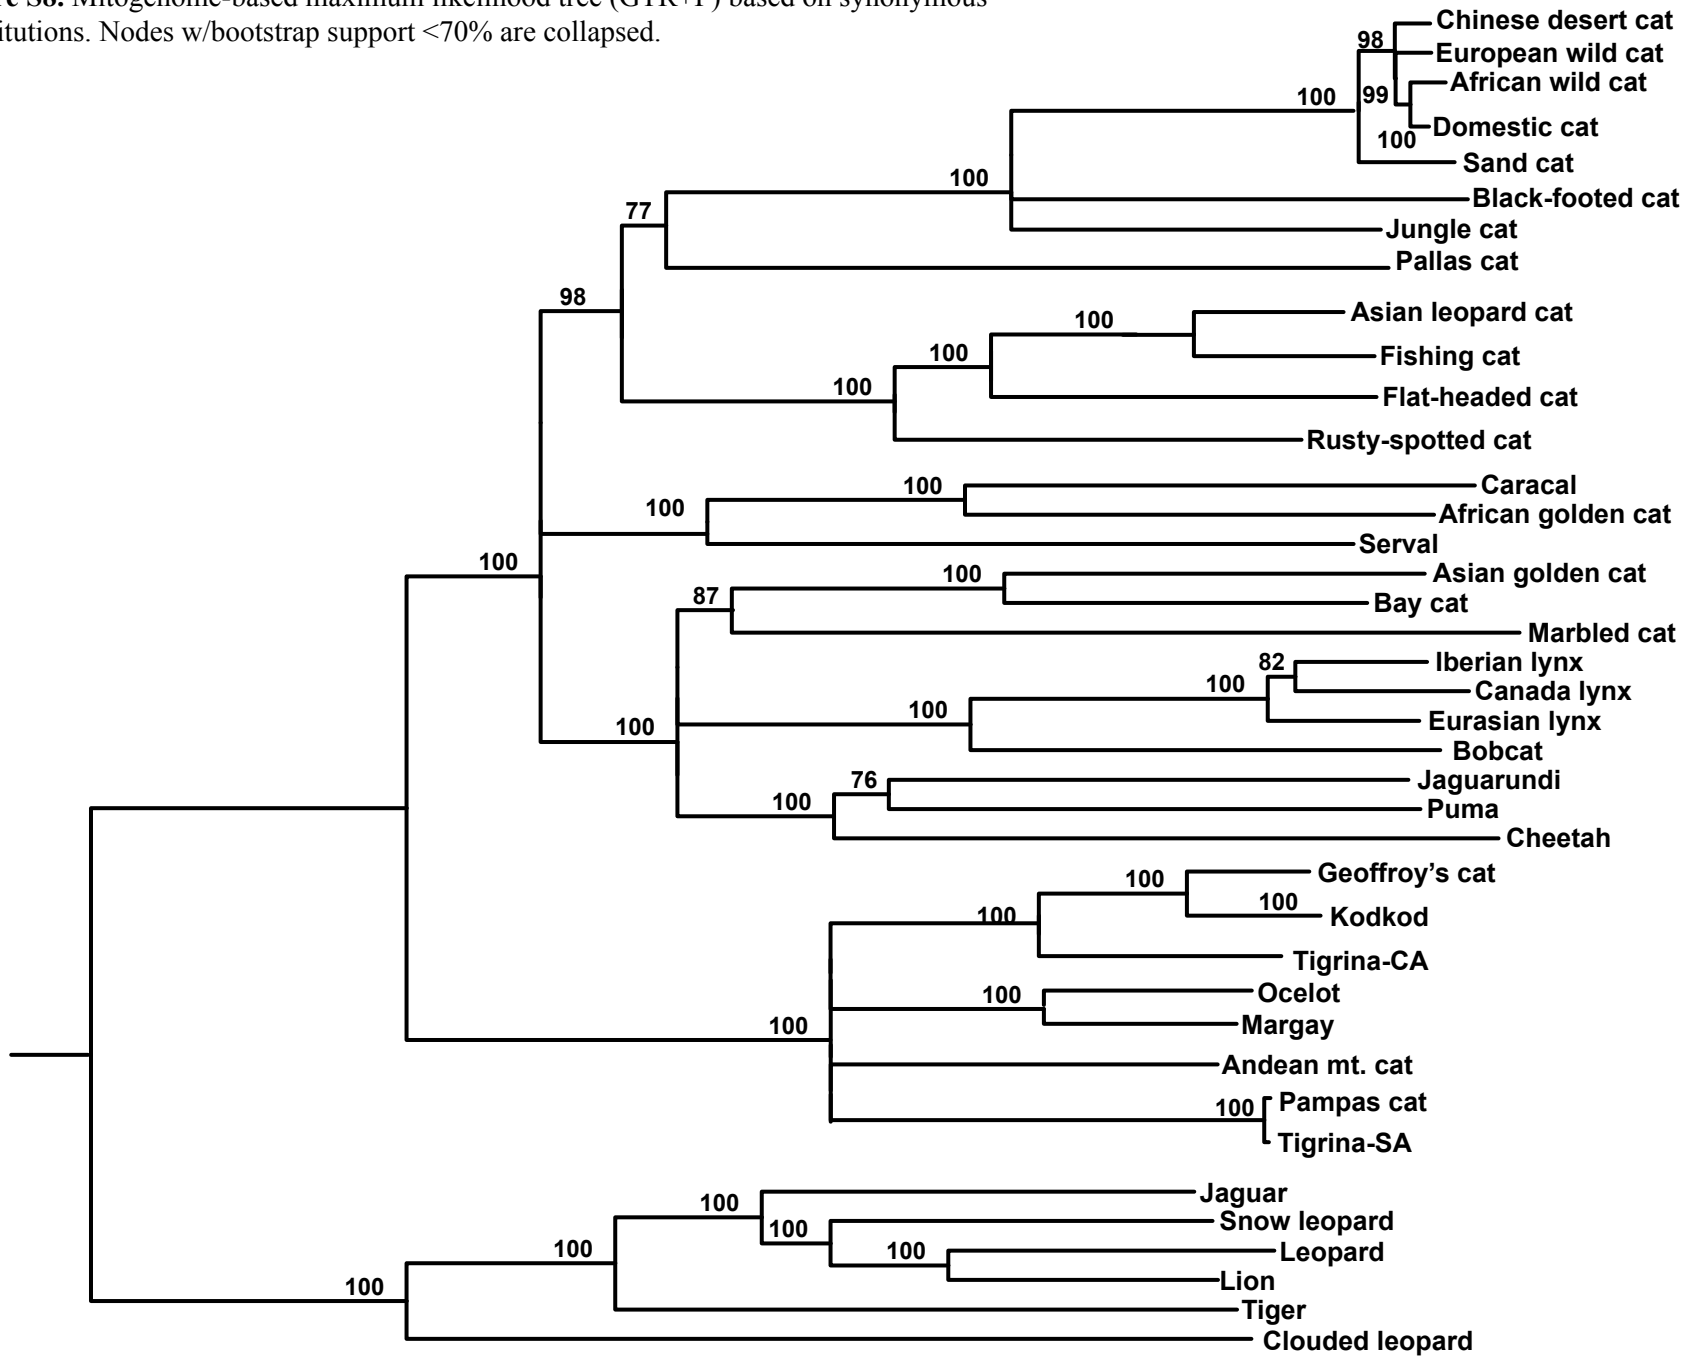

**Figure S9.** Frequency distribution of topologies (y axis) and divergence time point estimates (x axis, in millions of years) for each chromosome based on the tiger/snow leopard/lion whole genome analysis. Blue, green and red lines indicate trees with topologies grouping tiger + snow leopard, lion + tiger, and lion + snow leopard, respectively.

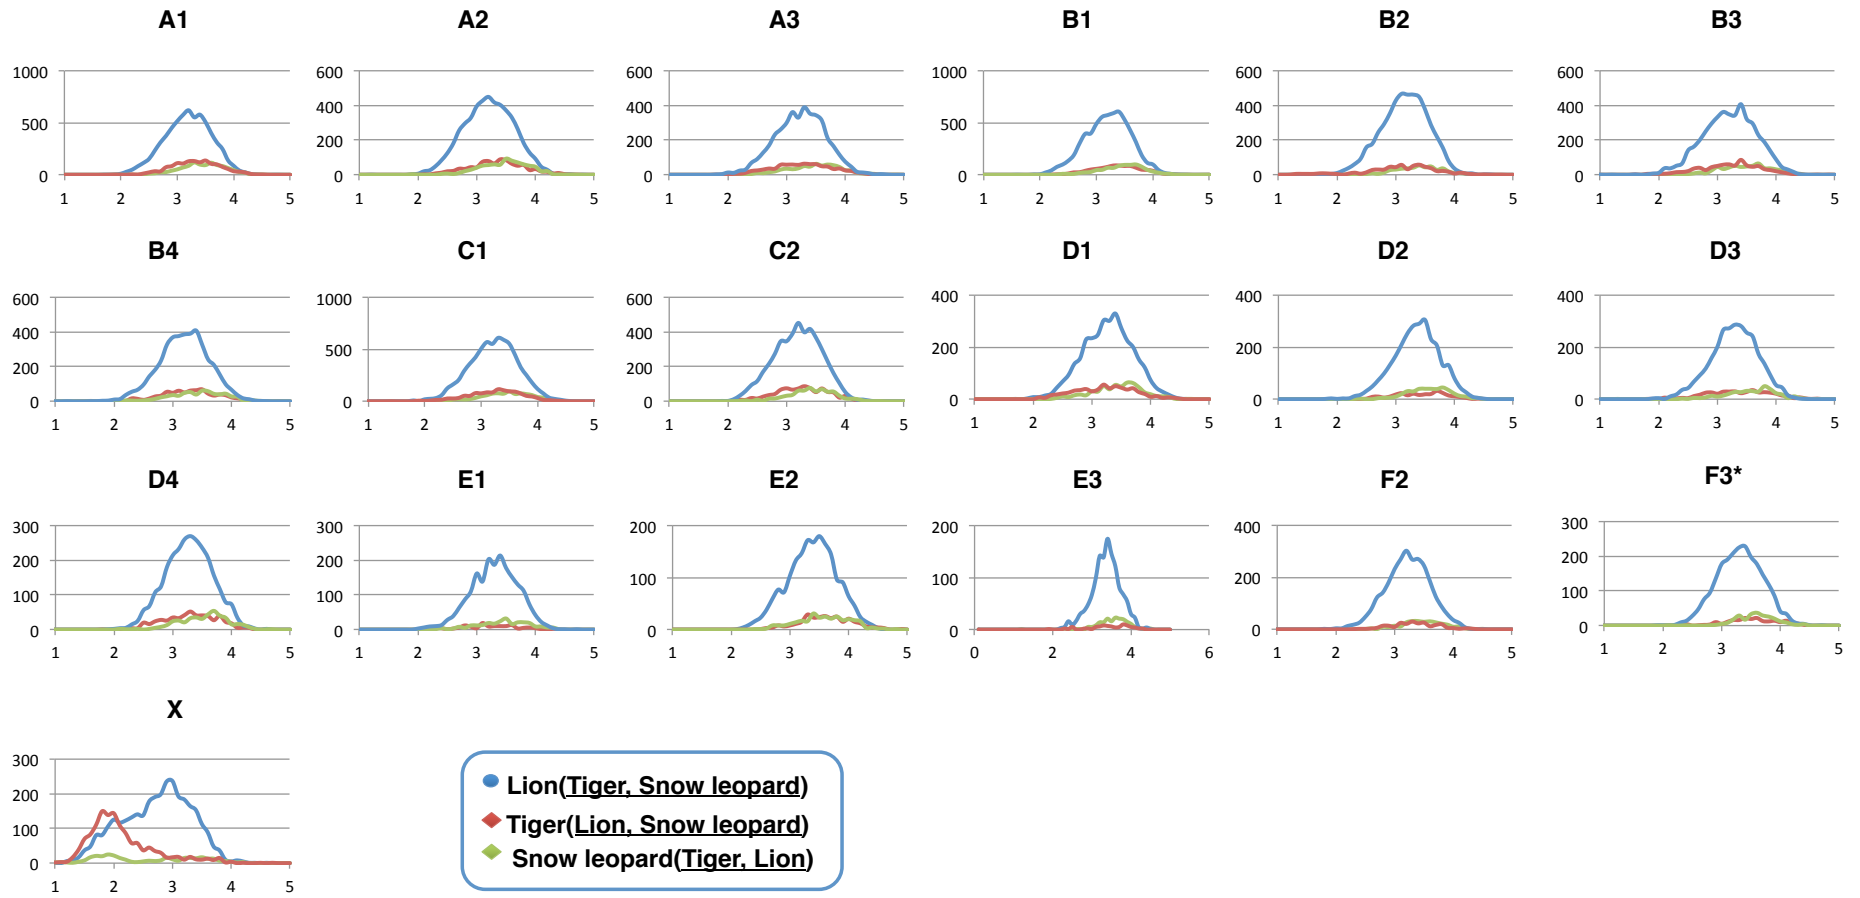

\**Panthera* chromosome F3 is orthologous to domestic cat chromosome F1 (Wurster-Hill and Centerwall, 1982).

**Table S1. Illumina 63K SNP array and mitochondrial genome statistics for different felid specimens. The percentage of heterozygous SNPs in each felid species was negatively correlated with genome divergence from the domestic cat. The results demonstrate the expected low genome-wide heterozygosity of these markers among non-*Felis silvestris* complex species of the Felidae. Only two individuals had call rates <90%: Sunda clouded leopard, and the Andean mountain cat. The Andean mountain cat DNA extract is from preserved hide (Johnson et al. 2006), thus relatively poor DNA quality may have contributed to the reduced call rates and increased heterozygosity.**

| Species/3-letter code                | Common name             | # of individuals genotyped on array | % post-QC filtered SNPs | Within lineage average SNP call rates $\pm$ SEM | % Heterozygous SNPs | Mitogenome Length | Mean mitogenome coverage* |
|--------------------------------------|-------------------------|-------------------------------------|-------------------------|-------------------------------------------------|---------------------|-------------------|---------------------------|
| <i>Felis catus</i> /FCA              | Domestic cat            | 14                                  | 99.7                    |                                                 | 12.0                | 17009             | NA                        |
| <i>Felis lybica</i> /FLI             | African wild cat        | 3                                   | 99.3                    |                                                 | 11.7                | 16741             | 236.5                     |
| <i>Felis silvestris</i> /FSI         | European wild cat       | 3                                   | 99.3                    |                                                 | 6.2                 | 16584             | 273.5                     |
| <i>Felis bieti</i> /FBI              | Chinese desert cat      | 1                                   | 99.4                    | 98.7 $\pm$ 0.34                                 | 1.5                 | 16922             | 272.4                     |
| <i>Felis margarita</i> /FMA          | Sand cat                | 1                                   | 98.1                    |                                                 | 0.1                 | 16942             | 639.2                     |
| <i>Felis nigripes</i> /FNI           | Black-footed Cat        | 1                                   | 97.4                    |                                                 | 0.3                 | 16833             | 517.7                     |
| <i>Felis chaus</i> /FCH              | Jungle cat              | 7                                   | 97.6                    |                                                 | 0.5                 | 16725             | 800.8                     |
| <i>Prionailurus planiceps</i> /IPL   | Flat-headed cat         | 1                                   | 95.1                    |                                                 | 0.3                 | 16690             | 185.2                     |
| <i>Prionailurus rubiginosus</i> /PRU | Rusty-spotted cat       | 1                                   | 95.0                    |                                                 | 0.4                 | 16914             | 398.0                     |
| <i>Prionailurus viverrinus</i> /PVI  | Fishing cat             | 1                                   | 94.8                    | 94.8 $\pm$ 0.07                                 | 0.3                 | 16914             | 398.0                     |
| <i>Prionailurus bengalensis</i> /PBE | Asian leopard cat       | 13                                  | 94.7                    |                                                 | 0.9                 | 16718             | 437.2                     |
| <i>Otocolobus manul</i> /OMA         | Pallas's cat            | 1                                   | 94.6                    |                                                 | 0.2                 | 16710             | 174.3                     |
| <i>Acinonyx jubatus</i> /AJU         | Cheetah                 | 1                                   | 94.4                    |                                                 | 0.4                 | 16790             | 449.6                     |
| <i>Puma concolor</i> /PCO            | Puma                    | 1                                   | 94.4                    | 94.3 $\pm$ 0.06                                 | 0.3                 | 16897             | 188.2                     |
| <i>Puma yagouaroundi</i> /HJA        | Jaguarundi              | 1                                   | 94.2                    |                                                 | 0.7                 | 16780             | 288.7                     |
| <i>Pardofelis temminckii</i> /PTE    | Asian golden cat        | 3                                   | 94.4                    |                                                 | 0.4                 | 16949             | 198.7                     |
| <i>Pardofelis badia</i> /PBA         | Bay cat                 | 1                                   | 94.3                    | 94.3 $\pm$ 0.10                                 | 0.5                 | 16828             | 502.4                     |
| <i>Pardofelis marmorata</i> /PMA     | Marbled cat             | 1                                   | 94.0                    |                                                 | 0.3                 | 16871             | 367.8                     |
| <i>Lynx rufus</i> /LRU               | Bobcat                  | 1                                   | 94.9                    |                                                 | 0.6                 | 17027             | 192.1                     |
| <i>Lynx lynx</i> /LLY                | Eurasian lynx           | 1                                   | 94.4                    | 94.0 $\pm$ 0.42                                 | 0.4                 | 16718             | 1109.3                    |
| <i>Lynx canadensis</i> /LCA          | Canada lynx             | 1                                   | 94.2                    |                                                 | 0.2                 | 16665             | 435.5                     |
| <i>Lynx pardinus</i> /LYP            | Iberian lynx            | 1                                   | 92.6                    |                                                 | 0.2                 | 16841             | 79.9                      |
| <i>Leopardus pardalis</i> /LPA       | Ocelot                  | 1                                   | 94.2                    |                                                 | 0.8                 | 16695             | 80.0                      |
| <i>Leopardus wiedii</i> /LWI         | Margay                  | 1                                   | 93.8                    |                                                 | 0.7                 | 16718             | 187.6                     |
| <i>Leopardus colocolo</i> /LCO       | Pampas cat              | 2                                   | 93.6                    |                                                 | 0.4                 | 16649             | 338.7                     |
| <i>Leopardus geoffroyi</i> /OGE      | Geoffroy's cat          | 2                                   | 93.4                    | 93.6 $\pm$ 0.10**                               | 0.6                 | 16750             | 340.4                     |
| <i>Leopardus tigrinus</i> /LTI 01&02 | Tigrina-NE Brazil/S.Am. | 2                                   | 93.4                    |                                                 | 0.4                 | 16644             | 316.4                     |
| <i>Leopardus "tigrinus"/LTI 03</i>   | Tigrina-CostaRica/C.Am. | 1                                   | 93.5                    |                                                 | 0.5                 | 16852             | 87.0                      |
| <i>Leopardus guigna</i> /OGU         | Kodkod                  | 1                                   | 93.4                    |                                                 | 0.3                 | 16772             | 274.4                     |
| <i>Leopardus jacobitus</i> /OJA      | Andean mountain cat     | 1                                   | 83.7                    |                                                 | 1.9                 | 16605             | 20.2                      |
| <i>Profelis serval</i> /PSE          | Serval                  | 20                                  | 94.4                    |                                                 | 0.8                 | 16707             | 2446.5                    |
| <i>Profelis aurata</i> /PAU          | African golden cat      | 1                                   | 93.6                    | 93.8 $\pm$ 0.22                                 | 0.6                 | 16917             | 267.5                     |
| <i>Profelis caracal</i> /CCA         | Caracal                 | 1                                   | 93.5                    |                                                 | 0.7                 | 16899             | 219.9                     |
| <i>Panthera leo</i> /PLE             | Lion                    | 1                                   | 92.3                    |                                                 | 0.4                 | 16619             | 195.5                     |
| <i>Panthera uncia</i> /PUN           | Snow leopard            | 1                                   | 92.1                    |                                                 | 0.2                 | 16709             | 238.1                     |
| <i>Panthera pardus</i> /PPA          | Leopard                 | 1                                   | 92.0                    |                                                 | 0.2                 | 16678             | 508.8                     |
| <i>Panthera tigris</i> /PTI          | Tiger                   | 1                                   | 92.0                    | 91.9 $\pm$ 0.13***                              | 0.4                 | 16792             | 831.6                     |
| <i>Panthera onca</i> /PON            | Jaguar                  | 1                                   | 91.3                    |                                                 | 0.3                 | 16708             | 270.1                     |
| <i>Neofelis nebulosa</i> /NNE        | Clouded leopard         | 1                                   | 91.8                    |                                                 | 0.2                 | 16681             | 226.0                     |
| <i>Neofelis diardi</i> /NDI          | Sunda clouded leopard   | 2                                   | 86.2                    |                                                 | 2.3                 | NA                | NA                        |

\*Estimated from mapping single-end Illumina 100-bp reads

\*\*excluding *Leopardus jacobitus*

\*\*\*excluding *Neofelis diardi*

**Table S2. Felid mitogenomes in GenBank with apparent numts.**

| <b>Species</b>  | <b>Acc. No.</b> | <b>Sequencing Method</b> | <b>PCR-based</b> | <b>Mitochondrial Enrichment?</b> | <b>Genes with numt origin</b>                 | <b>Publication (PubMed id)</b> |
|-----------------|-----------------|--------------------------|------------------|----------------------------------|-----------------------------------------------|--------------------------------|
| Jaguar          | KF483864        | Sanger                   | Yes              | ?                                | <i>ND2, COX1, COX2, ND3, ND4, ATP8, tRNAs</i> | 25010076                       |
| Leopard         | NC_010641       | Sanger                   | Yes              | Yes                              | <i>ND2, tRNAs, COX2</i>                       | 22038004                       |
| Snow leopard    | NC_010638       | Sanger                   | Yes              | Yes                              | <i>COX3, ND3</i>                              | 18431688                       |
| African Lion    | KF907306        | Illumina                 | No               | ?                                | <i>ND2, COX1, COX2, ND2, ND3, ND4, ATP6</i>   | 24438244*                      |
| Clouded leopard | NC_008450       | Sanger                   | Yes              | No                               | <i>16SrRNA</i>                                | 17546090                       |
| Puma            | NC_016470       | ?                        | ?                | ?                                | <i>12SrRNA, tRNAval, 16SrRNA</i>              | unpublished                    |
| Tiger           | HM589214        | Sanger                   | Yes              | No                               | <i>COX2, ATP8, ATP6, COX3, ND4</i>            | 21110106                       |
| Tiger           | NC_014770       | Sanger                   | Yes              | No                               | <i>COX2, ATP8, ATP6, COX3, ND4</i>            | 21110106                       |
| Tiger           | JF357972        | Sanger                   | Yes              | No                               | <i>COX2, ATP8, ATP6, COX3, ND4</i>            | 21723800                       |

\* withdrawn from PubMed due to an unspecified error in the data.

Table S3. Results of multidivtime analyses performed on the biparental nuclear DNA genome partition, with different partitions and constraints.

|                                                           | HARD-BOUNDED CONSTRAINTS |      |       |                   |      |       |                                            |      |       |                   |      |       |
|-----------------------------------------------------------|--------------------------|------|-------|-------------------|------|-------|--------------------------------------------|------|-------|-------------------|------|-------|
|                                                           | No SNPs                  |      |       |                   |      |       | SNPs w/out <i>Felis sylvestris</i> complex |      |       |                   |      |       |
|                                                           | Autocorrelated rates     |      |       | Independent rates |      |       | Autocorrelated rates                       |      |       | Independent rates |      |       |
| <b>Felidae</b>                                            | 10.59                    | 8.38 | 13.74 | 9.91              | 7.91 | 12.77 | 11.66                                      | 9.26 | 15.10 | 10.20             | 8.34 | 12.84 |
| <b>Felinae</b>                                            | 9.93                     | 7.85 | 12.80 | 9.06              | 7.42 | 11.49 | 11.02                                      | 8.93 | 14.03 | 9.62              | 7.85 | 12.04 |
| <b>Ocelot lineage/Lynx+Puma+ALC+DC lineages</b>           | 9.19                     | 7.29 | 11.86 | 8.38              | 6.83 | 10.65 | 9.92                                       | 8.07 | 12.56 | 8.90              | 7.23 | 11.22 |
| <b>Ocelot lineage</b>                                     | 3.02                     | 2.01 | 4.14  | 2.98              | 2.22 | 3.98  | 3.57                                       | 2.77 | 4.63  | 2.12              | 1.64 | 2.81  |
| <b>Pampas cat/tigrinas+Geoffroy's cat+kodkod</b>          | 2.41                     | 1.60 | 3.33  | 2.37              | 1.71 | 3.21  | 3.24                                       | 2.52 | 4.21  | 1.90              | 1.44 | 2.56  |
| <b>C.Am. tigrina/S. Am. tigrina+Geoffroy's cat+kodkod</b> |                          |      |       |                   |      |       | 1.58                                       | 1.10 | 2.21  | 1.47              | 1.00 | 2.13  |
| <b>tigrina/Geoffroy's cat+kodkod</b>                      | 1.28                     | 0.81 | 1.82  | 1.30              | 0.87 | 1.84  | 1.46                                       | 1.07 | 1.98  | 0.91              | 0.61 | 1.28  |
| <b>Geoffroy's cat/kodkod</b>                              | 0.61                     | 0.28 | 1.17  | 0.71              | 0.30 | 1.35  | 1.14                                       | 0.83 | 1.58  | 0.69              | 0.43 | 1.05  |
| <b>Andean mountain cat/ocelot+margay</b>                  | 2.83                     | 1.86 | 3.91  | 2.75              | 1.98 | 3.74  | 3.31                                       | 2.56 | 4.31  | 1.92              | 1.45 | 2.56  |
| <b>ocelot/margay</b>                                      | 2.24                     | 1.47 | 3.10  | 2.10              | 1.42 | 2.97  | 3.09                                       | 2.37 | 4.04  | 1.76              | 1.27 | 2.40  |
| <b>Lynx+Bay Cat lineage/Puma+ALC+DC lineages</b>          | 8.19                     | 6.51 | 10.52 | 7.55              | 6.19 | 9.52  | 8.66                                       | 7.05 | 10.99 | 8.06              | 6.60 | 10.07 |
| <b>Lynx lineage/Bay cat lineage</b>                       | 7.70                     | 6.13 | 9.90  | 7.03              | 5.69 | 8.96  | 7.95                                       | 6.49 | 10.09 | 7.26              | 5.85 | 9.16  |
| <b>Lynx lineage</b>                                       | 3.39                     | 2.61 | 4.50  | 3.28              | 2.57 | 4.42  | 3.26                                       | 2.57 | 4.35  | 3.02              | 2.52 | 4.00  |
| <b>lynx clade</b>                                         | 1.49                     | 1.03 | 2.15  | 1.59              | 1.05 | 2.46  | 1.48                                       | 1.09 | 2.09  | 1.48              | 0.92 | 2.23  |
| <b>Eurasian lynx/Iberian Lynx</b>                         | 1.03                     | 0.70 | 1.43  | 1.02              | 0.61 | 1.57  | 1.04                                       | 0.76 | 1.49  | 1.00              | 0.53 | 1.70  |
| <b>Bay cat lineage</b>                                    | 5.31                     | 4.18 | 6.90  | 4.38              | 3.00 | 5.99  | 5.81                                       | 4.66 | 7.46  | 4.82              | 3.48 | 6.58  |
| <b>Bay cat/Asian golden cat</b>                           | 3.45                     | 2.48 | 4.79  | 2.81              | 1.73 | 4.14  | 3.31                                       | 2.58 | 4.33  | 2.55              | 1.65 | 3.90  |
| <b>Puma lineage/ALC+Domestic cat lineages</b>             | 7.76                     | 6.22 | 9.94  | 7.14              | 5.83 | 9.03  | 7.90                                       | 6.46 | 10.03 | 7.43              | 6.12 | 9.27  |
| <b>Puma lineage</b>                                       | 5.11                     | 4.05 | 6.67  | 4.49              | 3.83 | 5.78  | 4.59                                       | 3.84 | 5.91  | 4.42              | 3.82 | 5.68  |
| <b>puma/jaguarundi</b>                                    | 4.06                     | 3.16 | 5.33  | 3.38              | 2.48 | 4.50  | 3.26                                       | 2.64 | 4.30  | 2.84              | 2.04 | 3.84  |
| <b>Domestic cat lineage/Leopard cat lineage</b>           | 6.93                     | 5.56 | 8.86  | 6.40              | 5.16 | 8.21  | 6.86                                       | 5.62 | 8.73  | 6.60              | 5.35 | 8.24  |
| <b>Leopard cat lineage</b>                                | 5.37                     | 4.26 | 6.89  | 5.09              | 3.90 | 6.68  | 5.97                                       | 4.87 | 7.61  | 5.47              | 4.22 | 7.00  |
| <b><i>Prionailurus</i> clade</b>                          | 3.46                     | 2.53 | 4.73  | 3.75              | 2.70 | 5.11  | 3.30                                       | 2.61 | 4.27  | 3.27              | 2.35 | 4.58  |
| <b>flat-headed cat/Asian leopard cat+fishing cat</b>      | 1.83                     | 1.34 | 2.49  | 2.28              | 1.57 | 3.19  | 2.41                                       | 1.87 | 3.18  | 2.28              | 1.57 | 3.39  |
| <b>Asian leopard cat/fishing cat</b>                      | 1.40                     | 1.07 | 1.86  | 1.62              | 1.11 | 2.28  | 1.85                                       | 1.40 | 2.46  | 1.68              | 1.03 | 2.56  |
| <b>Sundaic/Indochinese Asian leopard cats</b>             |                          |      |       |                   |      |       |                                            |      |       |                   |      |       |
| <b>Indochinese Asian leopard cats</b>                     |                          |      |       |                   |      |       |                                            |      |       |                   |      |       |
| <b>Domestic cat lineage</b>                               | 4.26                     | 3.36 | 5.50  | 3.89              | 2.97 | 5.23  | 3.38                                       | 2.68 | 4.47  | 3.93              | 2.00 | 5.40  |
| <b>black-footed cat/sand cat+domestic cat clade</b>       | 3.22                     | 2.52 | 4.17  | 2.89              | 2.20 | 3.91  |                                            |      |       |                   |      |       |
| <b>sand cat/domestic cat clade</b>                        | 2.64                     | 2.05 | 3.44  | 2.37              | 1.79 | 3.22  |                                            |      |       |                   |      |       |
| <b>domestic cat clade</b>                                 | 1.48                     | 1.19 | 1.92  | 1.45              | 1.17 | 1.89  |                                            |      |       |                   |      |       |
| <b>domestic cat/European wild cat</b>                     | 1.10                     | 1.00 | 1.35  | 1.11              | 1.00 | 1.36  |                                            |      |       |                   |      |       |
| <b>African wild cat/Chinese desert cat</b>                | 1.15                     | 0.82 | 1.52  | 1.12              | 0.68 | 1.55  |                                            |      |       |                   |      |       |
| <b>Caracal lineage</b>                                    | 6.73                     | 5.12 | 8.88  | 5.08              | 3.87 | 7.43  | 6.82                                       | 5.11 | 9.22  | 4.82              | 3.84 | 6.43  |
| <b>caracal/African golden cat</b>                         | 2.52                     | 1.61 | 3.74  | 1.71              | 1.05 | 2.78  | 1.45                                       | 0.89 | 2.26  | 1.01              | 0.57 | 1.81  |
| <b>Pantherinae</b>                                        | 5.27                     | 4.04 | 7.11  | 5.33              | 4.06 | 7.23  | 5.42                                       | 4.05 | 7.44  | 4.57              | 3.83 | 6.14  |
| <b><i>Neofelis</i></b>                                    |                          |      |       |                   |      |       | 1.87                                       | 1.27 | 2.78  | 1.71              | 0.96 | 2.52  |
| <b><i>Panthera</i></b>                                    | 3.51                     | 2.67 | 4.76  | 3.59              | 2.69 | 4.83  | 3.66                                       | 2.73 | 5.15  | 2.72              | 2.04 | 3.56  |
| <b>jaguar/lion+leopard</b>                                | 2.55                     | 1.91 | 3.46  | 2.64              | 1.89 | 3.64  | 2.70                                       | 1.97 | 3.85  | 1.99              | 1.48 | 2.71  |
| <b>lion/leopard</b>                                       | 1.68                     | 1.23 | 2.33  | 1.73              | 1.15 | 2.57  | 1.93                                       | 1.38 | 2.79  | 1.42              | 0.88 | 2.05  |
| <b>tiger/snow leopard</b>                                 | 2.61                     | 1.95 | 3.56  | 2.41              | 1.51 | 3.49  | 2.79                                       | 2.05 | 3.97  | 1.78              | 1.14 | 2.55  |

|                                                           | SOFT-BOUNDED CONSTRAINTS |      |       |                   |      |       |                                            |       |       |                   |      |       |
|-----------------------------------------------------------|--------------------------|------|-------|-------------------|------|-------|--------------------------------------------|-------|-------|-------------------|------|-------|
|                                                           | No SNPs                  |      |       |                   |      |       | SNPs w/out <i>Felis sylvestrus</i> complex |       |       |                   |      |       |
|                                                           | Autocorrelated rates     |      |       | Independent rates |      |       | Autocorrelated rates                       |       |       | Independent rates |      |       |
| <b>Felidae</b>                                            | 12.64                    | 9.37 | 15.96 | 11.21             | 8.37 | 14.92 | 13.67                                      | 10.26 | 16.35 | 11.76             | 8.66 | 15.46 |
| <b>Felinae</b>                                            | 11.75                    | 8.76 | 15.14 | 10.24             | 7.82 | 13.43 | 12.56                                      | 9.60  | 15.48 | 11.16             | 8.28 | 14.76 |
| <b>Ocelot lineage/Lynx+Puma+ALC+DC lineages</b>           | 10.89                    | 8.10 | 14.02 | 9.53              | 7.28 | 12.47 | 11.35                                      | 8.67  | 14.04 | 10.33             | 7.65 | 13.69 |
| <b>Ocelot lineage</b>                                     | 3.62                     | 2.58 | 4.82  | 3.40              | 2.44 | 4.65  | 3.85                                       | 2.03  | 5.03  | 2.59              | 1.85 | 3.64  |
| <b>Pampas cat/tigrinas+Geoffroy's cat+kodkod</b>          | 2.89                     | 2.06 | 3.90  | 2.69              | 1.88 | 3.72  | 3.50                                       | 1.84  | 4.60  | 2.32              | 1.63 | 3.26  |
| <b>C.Am. tigrina/S. Am. tigrina+Geoffroy's cat+kodkod</b> |                          |      |       |                   |      |       | 2.02                                       | 1.41  | 2.59  | 1.30              | 0.83 | 1.92  |
| <b>tigrina/Geoffroy's cat+kodkod</b>                      | 1.54                     | 1.06 | 2.15  | 1.47              | 0.97 | 2.15  | 1.59                                       | 0.82  | 2.19  | 1.12              | 0.71 | 1.70  |
| <b>Geoffroy's cat/kodkod</b>                              | 0.78                     | 0.35 | 1.41  | 0.82              | 0.34 | 1.51  | 1.25                                       | 0.64  | 1.76  | 0.85              | 0.48 | 1.35  |
| <b>Andean mountain cat/ocelot+margay</b>                  | 3.39                     | 2.40 | 4.54  | 3.15              | 2.21 | 4.37  | 3.58                                       | 1.85  | 4.71  | 2.35              | 1.66 | 3.33  |
| <b>ocelot/margay</b>                                      | 2.68                     | 1.89 | 3.61  | 2.42              | 1.57 | 3.46  | 3.33                                       | 1.71  | 4.40  | 2.17              | 1.49 | 3.13  |
| <b>Lynx+Bay Cat lineage/Puma+ALC+DC lineages</b>          | 9.72                     | 7.24 | 12.52 | 8.63              | 6.58 | 11.34 | 9.96                                       | 7.64  | 12.30 | 9.30              | 6.97 | 12.24 |
| <b>Lynx lineage/Bay cat lineage</b>                       | 9.15                     | 6.80 | 11.80 | 8.06              | 6.07 | 10.69 | 9.15                                       | 7.01  | 11.35 | 8.35              | 6.11 | 11.09 |
| <b>Lynx lineage</b>                                       | 4.05                     | 2.90 | 5.40  | 3.75              | 2.59 | 5.28  | 3.80                                       | 2.74  | 5.20  | 3.31              | 2.43 | 4.94  |
| <b>lynx clade</b>                                         | 1.77                     | 1.16 | 2.57  | 1.76              | 1.14 | 2.64  | 1.74                                       | 1.17  | 2.53  | 1.54              | 0.90 | 2.76  |
| <b>Eurasian lynx/Iberian Lynx</b>                         | 1.22                     | 0.80 | 1.70  | 1.14              | 0.67 | 1.72  | 1.22                                       | 0.81  | 1.81  | 1.06              | 0.52 | 2.25  |
| <b>Bay cat lineage</b>                                    | 6.31                     | 4.61 | 8.27  | 5.01              | 3.29 | 7.19  | 6.70                                       | 5.05  | 8.43  | 5.65              | 3.71 | 8.51  |
| <b>Bay cat/Asian golden cat</b>                           | 4.13                     | 2.78 | 5.80  | 3.19              | 1.89 | 4.81  | 3.81                                       | 2.77  | 4.93  | 2.92              | 1.62 | 4.95  |
| <b>Puma lineage/ALC+Domestic cat lineages</b>             | 9.22                     | 6.87 | 11.86 | 8.18              | 6.22 | 10.75 | 9.10                                       | 6.98  | 11.28 | 8.65              | 6.48 | 11.41 |
| <b>Puma lineage</b>                                       | 6.13                     | 4.54 | 8.06  | 5.10              | 3.79 | 7.03  | 5.34                                       | 3.96  | 6.87  | 4.71              | 3.65 | 6.55  |
| <b>puma/jaguarundi</b>                                    | 4.88                     | 3.60 | 6.46  | 3.91              | 2.55 | 5.56  | 3.80                                       | 2.79  | 5.00  | 3.14              | 2.04 | 4.72  |
| <b>Domestic cat lineage/Leopard cat lineage</b>           | 8.22                     | 6.13 | 10.61 | 7.32              | 5.55 | 9.71  | 7.92                                       | 6.06  | 9.87  | 7.74              | 5.79 | 10.24 |
| <b>Leopard cat lineage</b>                                | 6.38                     | 4.70 | 8.33  | 5.84              | 4.27 | 7.83  | 6.90                                       | 5.26  | 8.61  | 6.54              | 4.81 | 8.77  |
| <b><i>Prionailurus</i> clade</b>                          | 4.14                     | 2.86 | 5.82  | 4.33              | 2.99 | 6.01  | 3.82                                       | 2.84  | 4.87  | 3.99              | 2.77 | 5.53  |
| <b>flat-headed cat/Asian leopard cat+fishing cat</b>      | 2.18                     | 1.51 | 3.09  | 2.65              | 1.69 | 3.84  | 2.79                                       | 2.05  | 3.62  | 2.80              | 1.93 | 3.95  |
| <b>Asian leopard cat/fishing cat</b>                      | 1.66                     | 1.18 | 2.27  | 1.89              | 1.18 | 2.85  | 2.14                                       | 1.56  | 2.79  | 2.09              | 1.33 | 3.09  |
| <b>Sundaic/Indochinese Asian leopard cats</b>             | 0.90                     | 0.65 | 1.26  | 0.82              | 0.51 | 1.21  | 1.04                                       | 0.71  | 1.42  | 0.93              | 0.53 | 1.50  |
| <b>Indochinese Asian leopard cats</b>                     | 0.46                     | 0.32 | 0.66  | 0.42              | 0.22 | 0.67  | 0.53                                       | 0.36  | 0.76  | 0.46              | 0.24 | 0.80  |
| <b>Domestic cat lineage</b>                               | 4.96                     | 3.68 | 6.50  | 4.48              | 3.23 | 6.14  | 3.95                                       | 2.94  | 5.09  | 5.00              | 3.44 | 7.16  |
| <b>black-footed cat/sand cat+domestic cat clade</b>       | 3.71                     | 2.74 | 4.88  | 3.28              | 2.36 | 4.56  |                                            |       |       |                   |      |       |
| <b>sand cat/domestic cat clade</b>                        | 3.01                     | 2.18 | 4.05  | 2.67              | 1.88 | 3.73  |                                            |       |       |                   |      |       |
| <b>domestic cat clade</b>                                 | 1.61                     | 1.19 | 2.21  | 1.54              | 1.15 | 2.14  |                                            |       |       |                   |      |       |
| <b>domestic cat/European wild cat</b>                     | 1.14                     | 0.92 | 1.54  | 1.11              | 0.89 | 1.48  |                                            |       |       |                   |      |       |
| <b>African wild cat/Chinese desert cat</b>                | 1.25                     | 0.85 | 1.77  | 1.19              | 0.74 | 1.73  |                                            |       |       |                   |      |       |
| <b>Caracal lineage</b>                                    | 8.01                     | 5.84 | 10.57 | 5.44              | 3.82 | 8.07  | 7.84                                       | 5.64  | 10.34 | 5.49              | 3.71 | 9.00  |
| <b>caracal/African golden cat</b>                         | 2.98                     | 1.84 | 4.45  | 1.87              | 1.10 | 3.10  | 1.66                                       | 1.02  | 2.53  | 1.16              | 0.56 | 2.29  |
| <b>Pantherinae</b>                                        | 6.28                     | 4.25 | 9.08  | 6.32              | 4.45 | 8.96  | 7.03                                       | 4.56  | 10.67 | 5.10              | 3.76 | 7.20  |
| <b><i>Neofelis</i></b>                                    |                          |      |       |                   |      |       | 2.46                                       | 1.41  | 4.11  | 1.90              | 1.09 | 2.98  |
| <b><i>Panthera</i></b>                                    | 4.18                     | 2.79 | 6.13  | 4.22              | 2.97 | 5.90  | 4.81                                       | 3.07  | 7.60  | 3.10              | 2.18 | 4.42  |
| <b>jaguar/lion+leopard</b>                                | 3.03                     | 2.01 | 4.48  | 3.07              | 2.12 | 4.30  | 3.56                                       | 2.23  | 5.71  | 2.28              | 1.58 | 3.34  |
| <b>lion/leopard</b>                                       | 2.00                     | 1.30 | 2.99  | 2.01              | 1.28 | 2.96  | 2.55                                       | 1.56  | 4.09  | 1.58              | 0.98 | 2.41  |
| <b>tiger/snow leopard</b>                                 | 3.11                     | 2.07 | 4.62  | 2.89              | 1.83 | 4.39  | 3.69                                       | 2.31  | 5.92  | 2.09              | 1.37 | 3.13  |



| AVERAGE DATES ACROSS RUNS |      |       | Johnson et al. 2006 dates |      |       |                                                           |
|---------------------------|------|-------|---------------------------|------|-------|-----------------------------------------------------------|
| Mean                      | min  | max   | Mean                      | min  | max   |                                                           |
| 11.46                     | 7.91 | 16.35 | 10.78                     | 8.38 | 14.45 | <b>Felidae</b>                                            |
| 10.67                     | 7.42 | 15.48 | NA                        | NA   | NA    | <b>Felinae</b>                                            |
| 9.81                      | 6.83 | 14.04 | NA                        | NA   | NA    | <b>Ocelot lineage/Lynx+Puma+ALC+DC lineages</b>           |
| 3.14                      | 1.64 | 5.03  | 2.91                      | 2.02 | 4.25  | <b>Ocelot lineage</b>                                     |
| 2.67                      | 1.44 | 4.60  | NA                        | NA   | NA    | <b>Pampas cat/tigrinas+Geoffroy's cat+kodkod</b>          |
|                           |      |       |                           |      |       | <b>C.Am. tigrina/S. Am. tigrina+Geoffroy's cat+kodkod</b> |
| 1.33                      | 0.61 | 2.19  | 0.93                      | 0.56 | 1.48  | <b>tigrina/Geoffroy's cat+kodkod</b>                      |
| 0.86                      | 0.28 | 1.76  | 0.74                      | 0.41 | 1.21  | <b>Geoffroy's cat/kodkod</b>                              |
| 2.91                      | 1.45 | 4.71  | NA                        | NA   | NA    | <b>Andean mountain cat/ocelot+margay</b>                  |
| 2.47                      | 1.27 | 4.40  | 1.58                      | 1.01 | 2.41  | <b>ocelot/margay</b>                                      |
| 8.76                      | 6.19 | 12.52 | NA                        | NA   | NA    | <b>Lynx+Bay Cat lineage/Puma+ALC+DC lineages</b>          |
| 8.08                      | 5.69 | 11.80 | NA                        | NA   | NA    | <b>Lynx lineage/Bay cat lineage</b>                       |
| 3.48                      | 2.43 | 5.40  | 3.24                      | 2.53 | 4.74  | <b>Lynx lineage</b>                                       |
| 1.61                      | 0.90 | 2.76  | 1.61                      | 1.06 | 2.6   | <b>lynx clade</b>                                         |
| 1.09                      | 0.52 | 2.25  | 1.18                      | 0.7  | 1.98  | <b>Eurasian lynx/Iberian Lynx</b>                         |
| 5.50                      | 3.00 | 8.51  | 5.86                      | 4.27 | 8.42  | <b>Bay cat lineage</b>                                    |
| 3.27                      | 1.62 | 5.80  | 4.3                       | 2.96 | 6.42  | <b>Bay cat/Asian golden cat</b>                           |
| 8.17                      | 5.83 | 11.86 | NA                        | NA   | NA    | <b>Puma lineage/ALC+Domestic cat lineages</b>             |
| 4.99                      | 3.65 | 8.06  | 4.92                      | 3.86 | 6.92  | <b>Puma lineage</b>                                       |
| 3.66                      | 2.04 | 6.46  | 4.17                      | 3.16 | 6.01  | <b>puma/jaguarundi</b>                                    |
| 7.25                      | 5.16 | 10.61 | 6.18                      | 4.8  | 8.55  | <b>Domestic cat lineage/Leopard cat lineage</b>           |
| 5.95                      | 3.90 | 8.77  | 5.86                      | 4.53 | 8.16  | <b>Leopard cat lineage</b>                                |
| 3.76                      | 2.35 | 6.01  | 4.59                      | 3.42 | 6.54  | <b>Prionailurus clade</b>                                 |
| 2.40                      | 1.34 | 3.95  | 2.94                      | 2.04 | 4.31  | <b>flat-headed cat/Asian leopard cat+fishing cat</b>      |
| 1.79                      | 1.03 | 3.09  | NA                        | NA   | NA    | <b>Asian leopard cat/fishing cat</b>                      |
|                           |      |       |                           |      |       | <b>Sundaic/Indochinese Asian leopard cats</b>             |
|                           |      |       |                           |      |       | <b>Indochinese Asian leopard cats</b>                     |
| 4.23                      | 2.00 | 7.16  | 3.36                      | 2.41 | 4.88  | <b>Domestic cat lineage</b>                               |
| 3.28                      | 2.20 | 4.88  | 3.04                      | 2.16 | 4.44  | <b>black-footed cat/sand cat+domestic cat clade</b>       |
| 2.67                      | 1.79 | 4.05  | 2.49                      | 1.72 | 3.67  | <b>sand cat/domestic cat clade</b>                        |
| 1.52                      | 1.15 | 2.21  | 1.4                       | 0.89 | 2.16  | <b>domestic cat clade</b>                                 |
| 1.12                      | 0.89 | 1.54  | 0.99                      | 0.59 | 1.62  | <b>domestic cat/European wild cat</b>                     |
| 1.18                      | 0.68 | 1.77  | 1.17                      | 0.72 | 1.86  | <b>African wild cat/Chinese desert cat</b>                |
| 6.28                      | 3.71 | 10.57 | 5.59                      | 4.14 | 7.91  | <b>Caracal lineage</b>                                    |
| 1.80                      | 0.56 | 4.45  | 1.88                      | 1.19 | 2.93  | <b>caracal/African golden cat</b>                         |
| 5.67                      | 3.76 | 10.67 | 6.37                      | 4.47 | 9.32  | <b>Pantherinae</b>                                        |
| 1.99                      | 0.96 | 4.11  | NA                        | NA   | NA    | <b>Neofelis</b>                                           |
| 3.72                      | 2.04 | 7.60  | 3.72                      | 2.44 | 5.79  | <b>Panthera</b>                                           |
| 2.73                      | 1.48 | 5.71  | 2.87                      | 1.81 | 4.63  | <b>jaguar/lion+leopard</b>                                |
| 1.86                      | 0.88 | 4.09  | NA                        | NA   | NA    | <b>lion/leopard</b>                                       |
| 2.67                      | 1.14 | 5.92  | 2.88                      | 1.82 | 4.62  | <b>tiger/snow leopard</b>                                 |

Table S4. Results of multidivtime analyses performed on the mitogenome matrix, with different partitions and constraints

| HARD-BOUNDED CONSTRAINTS |      |       |                      | SOFT-BOUNDED CONSTRAINTS |       |                   |      | AVERAGE DATES ACROSS RUNS |                      |      |       |       |      |                                                                                   |
|--------------------------|------|-------|----------------------|--------------------------|-------|-------------------|------|---------------------------|----------------------|------|-------|-------|------|-----------------------------------------------------------------------------------|
| Independent rates        |      |       | Autocorrelated rates |                          |       | Independent rates |      |                           | Autocorrelated rates |      |       | Mean  | min  | max                                                                               |
| 10.90                    | 7.45 | 15.50 | 11.93                | 6.46                     | 15.81 | 13.08             | 7.18 | 16.53                     | 13.98                | 9.73 | 16.76 | 12.47 | 6.46 | 16.76 Felidae                                                                     |
| 9.28                     | 5.17 | 13.76 | 10.53                | 6.09                     | 14.98 | 11.23             | 5.67 | 15.77                     | 12.31                | 7.17 | 16.00 | 10.84 | 5.17 | 16.00 Felinae                                                                     |
| 8.24                     | 4.82 | 12.67 | 9.50                 | 5.63                     | 14.28 | 10.18             | 5.13 | 15.19                     | 11.07                | 6.06 | 15.34 | 9.75  | 4.82 | 15.34 Lynx + Bay cat + Puma + Caracal + Asian leopard cat + Domestic Cat lineages |
| 6.64                     | 4.24 | 11.26 | 7.58                 | 4.24                     | 13.17 | 8.35              | 4.27 | 14.26                     | 8.73                 | 4.35 | 14.43 | 7.83  | 4.24 | 14.43 Lynx + Bay cat + Puma lineages                                              |
| 4.97                     | 3.83 | 8.98  | 5.23                 | 3.85                     | 9.23  | 5.69              | 3.60 | 11.05                     | 5.68                 | 3.61 | 11.09 | 5.39  | 3.60 | 11.09 Puma lineage                                                                |
| 2.44                     | 1.82 | 3.42  | 2.51                 | 1.82                     | 4.07  | 1.66              | 0.96 | 3.54                      | 1.64                 | 0.96 | 3.57  | 2.06  | 0.96 | 4.07 puma/jaguarundi                                                              |
| 4.94                     | 2.93 | 8.95  | 5.47                 | 3.04                     | 10.64 | 6.09              | 2.88 | 12.28                     | 6.20                 | 2.98 | 12.85 | 5.68  | 2.88 | 12.85 Lynx + Bay cat lineage                                                      |
| 2.98                     | 1.84 | 5.40  | 2.89                 | 0.45                     | 7.39  | 2.98              | 0.41 | 8.03                      | 3.17                 | 0.45 | 8.47  | 3.01  | 0.41 | 8.47 Bay cat lineage                                                              |
| 2.23                     | 0.39 | 3.31  | 1.33                 | 0.04                     | 4.20  | 1.27              | 0.05 | 4.37                      | 1.52                 | 0.04 | 4.58  | 1.59  | 0.03 | 4.58 Bay cat/Asian golden cat                                                     |
| 3.34                     | 2.52 | 5.51  | 3.56                 | 2.55                     | 6.63  | 4.00              | 2.42 | 8.62                      | 4.01                 | 2.39 | 8.45  | 3.73  | 2.39 | 8.62 Lynx lineage                                                                 |
| 2.66                     | 1.84 | 4.28  | 1.92                 | 0.31                     | 4.44  | 2.16              | 0.36 | 5.00                      | 2.18                 | 0.38 | 5.25  | 2.23  | 0.31 | 5.25 lynx clade                                                                   |
| 2.36                     | 0.91 | 3.41  | 0.99                 | 0.03                     | 2.99  | 1.11              | 0.04 | 3.83                      | 1.13                 | 0.04 | 3.81  | 1.40  | 0.03 | 3.83 Canada lynx+Iberian lynx                                                     |
| 7.20                     | 4.58 | 11.46 | 8.19                 | 4.90                     | 13.21 | 8.94              | 4.78 | 14.22                     | 9.61                 | 5.22 | 14.66 | 8.49  | 4.58 | 14.66 Caracal lineage/Domestic cat + Asian leopard cat lineages                   |
| 5.10                     | 3.85 | 8.56  | 5.57                 | 3.86                     | 10.13 | 5.89              | 3.64 | 10.82                     | 6.17                 | 3.68 | 11.99 | 5.68  | 3.64 | 11.99 Caracal lineage                                                             |
| 2.65                     | 0.90 | 4.88  | 2.02                 | 0.08                     | 5.35  | 2.14              | 0.08 | 6.25                      | 2.24                 | 0.07 | 5.98  | 2.26  | 0.07 | 6.25 caracal+African golden cat                                                   |
| 5.93                     | 4.27 | 9.80  | 6.29                 | 4.29                     | 10.87 | 7.09              | 4.21 | 12.56                     | 7.39                 | 4.31 | 13.10 | 6.68  | 4.21 | 13.10 Domestic cat + Asian leopard cat lineages                                   |
| 4.02                     | 2.04 | 6.91  | 3.57                 | 0.73                     | 7.32  | 3.92              | 0.73 | 8.65                      | 3.92                 | 0.80 | 8.76  | 3.86  | 0.73 | 8.76 Prionailurus clade                                                           |
| 2.86                     | 1.84 | 4.78  | 2.18                 | 0.27                     | 4.95  | 2.29              | 0.27 | 5.74                      | 2.39                 | 0.31 | 5.91  | 2.43  | 0.27 | 5.91 flat-headed cat/Asian leopard cat+fishing cat                                |
| 2.38                     | 1.26 | 3.43  | 1.14                 | 0.02                     | 3.85  | 1.20              | 0.05 | 4.19                      | 1.33                 | 0.03 | 4.25  | 1.51  | 0.02 | 4.25 Asian leopard cat/fishing cat                                                |
| 4.26                     | 2.27 | 7.27  | 3.94                 | 1.46                     | 8.16  | 4.55              | 1.64 | 9.06                      | 4.67                 | 1.65 | 9.40  | 4.36  | 1.46 | 9.40 Pallas cat+Domestic cat lineage                                              |
| 2.81                     | 1.84 | 5.08  | 2.11                 | 1.03                     | 5.32  | 2.65              | 1.05 | 5.92                      | 2.85                 | 1.04 | 6.52  | 2.61  | 1.03 | 6.52 Domestic cat lineage                                                         |
| 2.61                     | 1.83 | 4.46  | 1.77                 | 0.62                     | 4.48  | 2.14              | 0.69 | 4.71                      | 2.33                 | 0.73 | 5.31  | 2.21  | 0.62 | 5.31 black-footed cat/sand cat+domestic cat clade                                 |
| 2.50                     | 1.81 | 4.09  | 1.47                 | 0.39                     | 3.83  | 1.76              | 0.43 | 4.20                      | 1.96                 | 0.47 | 4.64  | 1.92  | 0.39 | 4.64 sand cat/domestic cat clade                                                  |
| 2.37                     | 1.14 | 3.39  | 1.18                 | 0.23                     | 3.22  | 1.39              | 0.24 | 3.93                      | 1.61                 | 0.26 | 4.35  | 1.64  | 0.23 | 4.35 domestic cat clade                                                           |
| 1.36                     | 0.06 | 2.83  | 0.74                 | 0.02                     | 2.82  | 0.80              | 0.02 | 3.27                      | 1.05                 | 0.02 | 4.21  | 0.99  | 0.02 | 4.21 domestic cat/African wild cat                                                |
| 1.94                     | 0.12 | 3.16  | 0.67                 | 0.02                     | 2.60  | 0.76              | 0.02 | 2.48                      | 0.97                 | 0.02 | 4.14  | 1.09  | 0.02 | 4.14 European wild cat+Chinese desert cat                                         |
| 4.31                     | 2.46 | 4.99  | 3.85                 | 1.25                     | 4.97  | 3.84              | 0.98 | 5.19                      | 3.88                 | 1.57 | 5.15  | 3.97  | 0.98 | 5.19 Ocelot lineage                                                               |
| 3.16                     | 1.67 | 4.85  | 2.32                 | 0.35                     | 4.63  | 2.41              | 0.35 | 4.79                      | 2.44                 | 0.39 | 4.74  | 2.58  | 0.35 | 4.85 Central Am. tigrina/Geoffroy's cat+kodkod                                    |
| 2.16                     | 0.11 | 4.64  | 1.16                 | 0.04                     | 3.76  | 1.27              | 0.04 | 4.03                      | 1.33                 | 0.04 | 4.26  | 1.48  | 0.04 | 4.64 Geoffroy's cat/kodkod                                                        |
| 3.67                     | 1.94 | 4.91  | 2.85                 | 0.73                     | 4.74  | 2.84              | 0.64 | 4.91                      | 2.88                 | 0.83 | 4.83  | 3.06  | 0.64 | 4.91 ocelot+margay/Andean mountain cat+Pampas cat+S. Am. tigrina                  |
| 2.84                     | 1.16 | 4.71  | 1.84                 | 0.26                     | 4.29  | 1.90              | 0.26 | 4.48                      | 1.92                 | 0.27 | 4.41  | 2.13  | 0.26 | 4.71 Andean mountain cat/Pampas cat+S. Am. tigrina                                |
| 1.62                     | 0.06 | 4.17  | 0.92                 | 0.02                     | 3.10  | 0.97              | 0.03 | 3.71                      | 1.04                 | 0.03 | 3.28  | 1.14  | 0.02 | 4.17 Pampas cat+S. Am. tigrina                                                    |
| 2.45                     | 0.14 | 4.76  | 1.38                 | 0.06                     | 4.03  | 1.40              | 0.05 | 4.27                      | 1.58                 | 0.05 | 4.34  | 1.70  | 0.05 | 4.76 ocelot+margay                                                                |
| 6.63                     | 4.04 | 11.09 | 7.22                 | 3.99                     | 12.95 | 8.30              | 3.96 | 14.20                     | 8.67                 | 4.09 | 14.52 | 7.71  | 3.96 | 14.52 Pantherinae                                                                 |
| 4.66                     | 2.06 | 8.53  | 4.53                 | 0.97                     | 10.21 | 5.12              | 1.03 | 11.44                     | 5.24                 | 1.09 | 11.75 | 4.89  | 0.97 | 11.75 Panthera                                                                    |
| 3.40                     | 1.86 | 6.81  | 3.00                 | 0.53                     | 7.87  | 3.25              | 0.55 | 8.50                      | 3.29                 | 0.56 | 8.66  | 3.24  | 0.53 | 8.66 jaguar/snow leopard+lion+leopard                                             |
| 2.66                     | 1.82 | 4.48  | 1.83                 | 0.20                     | 5.07  | 1.98              | 0.22 | 5.21                      | 2.11                 | 0.23 | 5.23  | 2.15  | 0.20 | 5.23 snow leopard/lion+leopard                                                    |
| 2.32                     | 0.49 | 3.45  | 0.89                 | 0.02                     | 3.06  | 1.09              | 0.02 | 4.03                      | 1.21                 | 0.02 | 4.23  | 1.38  | 0.02 | 4.23 lion/leopard                                                                 |

**Table S5. Results of ABBA/BABA tests based on the genus *Felis* whole genome SNV data.**

| Chromosome | ((Domestic cat, Sand cat), Jungle cat), Asian leopard cat |       |               |          |          | ((Sand cat, Domestic cat), Black-footed cat), Asian leopard cat |       |               |          |          |
|------------|-----------------------------------------------------------|-------|---------------|----------|----------|-----------------------------------------------------------------|-------|---------------|----------|----------|
|            | ABBA                                                      | BABA  | <i>D</i>      | <i>Z</i> | <i>P</i> | ABBA                                                            | BABA  | <i>D</i>      | <i>Z</i> | <i>P</i> |
| A1         | 40229                                                     | 33462 | 0.092 ± 0.001 | 64.14    | 0        | 49604                                                           | 40370 | 0.103 ± 0.002 | 63.77    | 0        |
| A2         | 28759                                                     | 23590 | 0.099 ± 0.002 | 53.39    | 0        | 35532                                                           | 28126 | 0.116 ± 0.002 | 71.62    | 0        |
| A3         | 22430                                                     | 18941 | 0.084 ± 0.002 | 39.26    | 0        | 28403                                                           | 22053 | 0.126 ± 0.002 | 68.33    | 0        |
| B1         | 35956                                                     | 29217 | 0.103 ± 0.002 | 55.21    | 0        | 44054                                                           | 34812 | 0.117 ± 0.001 | 89.86    | 0        |
| B2         | 25992                                                     | 21632 | 0.092 ± 0.002 | 38.20    | 0        | 32626                                                           | 25544 | 0.122 ± 0.002 | 72.06    | 0        |
| B3         | 23394                                                     | 19359 | 0.094 ± 0.002 | 42.95    | 0        | 28968                                                           | 23096 | 0.113 ± 0.002 | 47.78    | 0        |
| B4         | 24639                                                     | 19555 | 0.115 ± 0.002 | 47.41    | 0        | 30420                                                           | 23551 | 0.127 ± 0.003 | 50.53    | 0        |
| C1         | 35207                                                     | 29150 | 0.094 ± 0.002 | 59.10    | 0        | 43851                                                           | 34779 | 0.115 ± 0.001 | 79.56    | 0        |
| C2         | 26403                                                     | 22354 | 0.083 ± 0.002 | 43.59    | 0        | 32789                                                           | 26323 | 0.109 ± 0.002 | 62.84    | 0        |
| D1         | 19005                                                     | 15559 | 0.100 ± 0.002 | 42.02    | 0        | 23805                                                           | 19123 | 0.109 ± 0.003 | 35.30    | 0        |
| D2         | 17142                                                     | 13793 | 0.108 ± 0.002 | 48.16    | 0        | 21262                                                           | 16181 | 0.134 ± 0.003 | 41.38    | 0        |
| D3         | 17556                                                     | 14181 | 0.106 ± 0.003 | 42.44    | 0        | 22004                                                           | 17175 | 0.123 ± 0.003 | 44.64    | 0        |
| D4         | 16188                                                     | 13817 | 0.079 ± 0.003 | 29.41    | 0        | 20777                                                           | 16175 | 0.125 ± 0.003 | 38.43    | 0        |
| E1         | 12263                                                     | 9399  | 0.132 ± 0.005 | 26.54    | 0        | 14742                                                           | 11568 | 0.121 ± 0.003 | 34.50    | 0        |
| E2         | 10598                                                     | 8327  | 0.120 ± 0.005 | 23.65    | 0        | 13263                                                           | 10168 | 0.132 ± 0.004 | 30.44    | 0        |
| E3         | 8546                                                      | 6824  | 0.112 ± 0.005 | 21.79    | 0        | 10288                                                           | 8013  | 0.124 ± 0.005 | 23.74    | 0        |
| F1         | 12960                                                     | 10328 | 0.113 ± 0.004 | 26.98    | 0        | 16141                                                           | 12327 | 0.134 ± 0.003 | 46.16    | 0        |
| F2         | 14649                                                     | 12301 | 0.087 ± 0.004 | 23.28    | 0        | 18239                                                           | 14598 | 0.111 ± 0.003 | 35.89    | 0        |
| X          | 8081                                                      | 7122  | 0.063 ± 0.004 | 17.43    | 0        | 10743                                                           | 8551  | 0.113 ± 0.004 | 26.28    | 0        |

**Table S6. Results of the ABBA/BABA tests using a reduced set of high confidence orthologous SNPs.**

| <b>Species Tree (P1,P2) P3</b>             | <b>Outgroup</b>   | <b>ABBA</b> | <b>BABA</b> | <b><i>D</i></b> | <b><i>Z</i></b> | <b><i>P</i></b> |
|--------------------------------------------|-------------------|-------------|-------------|-----------------|-----------------|-----------------|
| (Sand cat, Domestic cat), Black-footed cat | Asian leopard cat | 1002        | 761         | 0.137 ± 0.028   | 4.88            | 1.05E-06        |
| (Black-footed cat, Sand cat), Jungle cat   | Asian leopard cat | 607         | 482         | 0.115 ± 0.032   | 3.63            | 0.000283        |
| (Domestic cat, Sand cat), Jungle cat       | Asian leopard cat | 895         | 602         | 0.196 ± 0.02    | 9.73            | 0               |

**Table S7. Summary of SNP-based *D*-statistics based on jackknifing the outgroup taxon for non-Domestic cat lineage comparisons (only significant results from Table 1 were evaluated).**

| <b>P1</b>       | <b>P2</b>       | <b>P3</b>       | <b>number of tested outgroups</b> | <b>range of Z-scores</b> | <b>range of ABBA sites</b> | <b>range of BABA sites</b> | <b>range of <i>D</i>-scores</b> | <b>range of <i>P</i> values</b> |
|-----------------|-----------------|-----------------|-----------------------------------|--------------------------|----------------------------|----------------------------|---------------------------------|---------------------------------|
| Malay/Sunda ALC | Indochinese ALC | Fishing cat     | 16                                | 3.5—7.7                  | 302—359                    | 192—222                    | 0.16—0.29                       | 0.0004—1.58e-14                 |
| Iberian lynx    | Eurasian lynx   | Canada lynx     | 16                                | 4.8—7.9                  | 264—330                    | 142—175                    | 0.23—0.34                       | 1.53E-06—3.55e-15               |
| Iberian lynx    | Canada lynx     | Bobcat          | 16                                | 3.1—6.2                  | 202—262                    | 122—148                    | 0.18—0.30                       | 0.0022—5.94e-10                 |
| Kodkod          | Geoffroy's cat  | Tigrina (S.Am.) | 16                                | 2.0—3.5                  | 220—235                    | 164—186                    | 0.09—0.17                       | 0.047—0.0005                    |

**Table S8. Results of ABBA/BABA tests between tiger (P1), snow leopard (P2) and lion (P3), using domestic cat as the outgroup species. Positive *D* scores support P2+P3, while negative scores support P1+P3.**

| Chromosome | SNV     | ABBA  | BABA  | <i>D</i>         | <i>Z</i> | <i>P</i>             |
|------------|---------|-------|-------|------------------|----------|----------------------|
| A1         | 2305655 | 41567 | 37017 | 0.0579 ± 0.0022  | 27.31    | 0                    |
| A2         | 1492397 | 25516 | 22562 | 0.0614 ± 0.0032  | 19.26    | 0                    |
| A3         | 1210659 | 19950 | 17983 | 0.0519 ± 0.0046  | 11.35    | 0                    |
| B1         | 1884034 | 34089 | 31771 | 0.0352 ± 0.0033  | 16.09    | 0                    |
| B2         | 1408000 | 24421 | 22447 | 0.0421 ± 0.0038  | 11.01    | 0                    |
| B3         | 1250800 | 20979 | 18519 | 0.0623 ± 0.0042  | 14.88    | 0                    |
| B4         | 1215044 | 21210 | 19210 | 0.0495 ± 0.0036  | 13.84    | 0                    |
| C1         | 1860373 | 31250 | 27894 | 0.0567 ± 0.0027  | 21.11    | 0                    |
| C2         | 1430423 | 25797 | 23095 | 0.0553 ± 0.0038  | 14.72    | 0                    |
| D1         | 944433  | 16591 | 15641 | 0.0295 ± 0.0044  | 6.68     | 2.40E-11             |
| D2         | 832379  | 14658 | 15526 | -0.0288 ± 0.0053 | 5.39     | 7.13E-08             |
| D3         | 856445  | 15066 | 14875 | 0.0064 ± 0.005   | 1.28     | 0.2013 <sup>NS</sup> |
| D4         | 793931  | 14208 | 12731 | 0.0548 ± 0.006   | 9.18     | 0                    |
| E1         | 453453  | 7179  | 7423  | -0.0167 ± 0.0101 | 1.65     | 0.0996 <sup>NS</sup> |
| E2         | 457214  | 7933  | 7340  | 0.0388 ± 0.0064  | 6.02     | 1.74E-09             |
| E3         | 282299  | 4504  | 4950  | -0.0472 ± 0.0091 | 5.17     | 2.39E-07             |
| F1         | 633514  | 11041 | 11284 | -0.0109 ± 0.0076 | 1.43     | 0.1516 <sup>NS</sup> |
| F2         | 774198  | 13645 | 13370 | 0.0102 ± 0.006   | 1.69     | 0.0914 <sup>NS</sup> |
| X          | 687121  | 8271  | 5872  | 0.1696 ± 0.014   | 11.76    | 0                    |

<sup>NS</sup>Not significant.

**Table S9. Summary of per-lineage variable sites in the SNP matrix and within sliding windows used for Fig. 2A.**

| <b>Lineage name</b> | <b>All variable sites</b> | <b>Average # sites/window</b> |
|---------------------|---------------------------|-------------------------------|
| Asian Leopard Cat   | 3359                      | 14.6                          |
| Domestic            | 20201                     | 87.8                          |
| Lynx                | 1076                      | 4.7                           |
| Bay Cat             | 2022                      | 8.8                           |
| Puma                | 1823                      | 7.9                           |
| Ocelot              | 1636                      | 7.1                           |
| Caracal             | 1261                      | 5.5                           |
| Panthera            | 2441                      | 7.4                           |

## Literature Cited

Davis BW, Seabury CM, Brashear W, Li G, Roelke-Parker M, Murphy WJ. 2015. Mechanisms underlying mammalian hybrid sterility in two interspecies models. *Mol. Biol. Evol.* May 25. pii: msv124. [Epub ahead of print]

Johnson WE, Slattery JP, Eizirik E, Kim JH, Raymond MM, Bonacic C, Cambre R, Crawshaw P, Nunes A, Seuanez HN *et al.* 1999. Disparate phylogeographic patterns of molecular genetic variation in four closely related South American small cat species. *Mol Ecol* **8**: S79-S94.

Johnson WE, Eizirik E, Pecon-Slattery J, Murphy WJ, Antunes A, Teeling E, O'Brien SJ. 2006. The Late Miocene radiation of modern Felidae: a genetic assessment. *Science* **311**: 73-77.

Montague MJ, Li G, Gandolfi B, Khan R, Aken BL, Searle SM, Minx P, Hillier LW, Koboldt DC, Davis BW *et al.* 2014. Comparative analysis of the domestic cat genome reveals genetic signatures underlying feline biology and domestication. *Proc Natl Acad Sci USA* **111**: 17230-17235.

Wurster-Hill DH, Centerwall WR. 1982. The interrelationships of chromosome-banding patterns in canids, mustelids, hyena, and felids. *Cytogenet Cell Genet* **34**: 178-192.
